# Supplementary material for: An immune-related prognostic model predicts neoplasm-immunity interactions for metastatic nasopharyngeal carcinoma
Source: Front Immunol. 2023 Mar 31;14:1109503. doi: 10.3389/fimmu.2023.1109503 (PMC10102363; doi:10.3389/fimmu.2023.1109503)
Supplement: Supplementary file 4 [file Table_1.xlsx]

## Sheet: Sheet1
ID	logFC	Pvalue	regulation	pos_info	ref_pos_info	ensembl	entrez	uniprot	symbol	description	cure|194791	cure|208071	cure|211896	cure|154126	cure|198366	metastasis|202779	metastasis|194839	metastasis|192638	metastasis|190628	metastasis|196448
ENSG00000273046	7.20843	5.27769e-06	up	12:+:54017110-54035361	12:+:54017110-54035361	ENSG00000273046	-	-	AC012531.2	-	0	0.00652	0	0	0.00635	0.15623	0.04898	2.02113	1.36578	1.69893
ENSG00000182103	5.77274	0.00336494	up	11:-:82729941-82733864	11:-:82729941-82733864	ENSG00000182103	220382	A6NEQ2	FAM181B	family with sequence similarity 181 member B [Source:HGNC Symbol;Acc:HGNC:28512]	0.07667	0	0.14814	0.0444	0.01798	3.54651	0.41176	0.40019	0.4036	10.9254
ENSG00000285396	5.52987	0.043238	up	15:+:40695129-40732158	15:+:40695129-40732158	ENSG00000285396	5888	Q06609	AC012476.1	RAD51 recombinase	0	0.24948	0	0.004	0	3.99586	2.61719	0.01209	2.24856	0
ENSG00000281655	4.34259	0.0143949	up	11:+:102681310-102683913	11:+:102681310-102683913	ENSG00000281655	-	-	AP000851.2	-	0	0.05022	0.09214	0	0	17.2341	0.18871	0.04867	0.07048	0.19043
ENSG00000230699	4.31732	0.0320726	up	1:+:911435-914948	1:+:911435-914948	ENSG00000230699	-	-	AL645608.3	-	0	0.14279	0.0846	0.18608	0.64064	4.06169	0.05589	6.1206	3.96317	0.64577
ENSG00000278807	4.24198	0.00530782	up	7:+:75309144-75315046	7:+:75309144-75315046	ENSG00000278807	641776	-	SPDYE14P	speedy/RINGO cell cycle regulator family member E14, pseudogene [Source:HGNC Symbol;Acc:HGNC:51510]	0	0	0.27277	0.57229	0	0.32138	1.01385	0.19211	0.77272	0.49065
ENSG00000258984	4.17028	0.0263179	up	2:+:237967014-238099412	2:+:237967014-238099412	ENSG00000258984	100533179	H3BUI7,H3BSR4	UBE2F-SCLY	UBE2F-SCLY readthrough (NMD candidate) [Source:HGNC Symbol;Acc:HGNC:48339]	0.01471	0.5383	0	0.86434	0.01933	0.46953	1.62892	0.05766	1.94298	1.23547
ENSG00000187140	4.13412	0.00550313	up	1:+:63323041-63325126	1:+:63323041-63325126	ENSG00000187140	27022	Q9UJU5	FOXD3	forkhead box D3 [Source:HGNC Symbol;Acc:HGNC:3804]	0.03606	1.25842	0.00398	0.03341	0.51168	3.14799	1.85895	0.63926	0.39382	1.9869
ENSG00000237517	4.00305	0.0346877	up	22:+:18970514-18994628	22:+:18970514-18994628	ENSG00000237517	26220	-	DGCR5	DiGeorge syndrome critical region gene 5 (non-protein coding) [Source:HGNC Symbol;Acc:HGNC:16757]	0.18883	0	0	0.07828	0.46934	0.51696	0.16181	0.20711	0.04625	1.88222
ENSG00000225826	3.99695	0.0337332	up	1:+:168786939-168792886	1:+:168786939-168792886	ENSG00000225826	79100	-	LINC00626	long intergenic non-protein coding RNA 626	0.03938	0	0.46957	0.05473	0	0.22723	0.03562	3.88582	0.06208	2.61477
ENSG00000250687	3.84021	0.00982647	up	5:+:70462244-70479215	5:+:70462244-70479215	ENSG00000250687	-	-	AC146944.2	-	0	0.16399	0.22566	0	1.52612	0.79479	0.8319	0.54831	0.72877	1.33691
ENSG00000285160	3.74903	0.0394022	up	13:-:52167954-52168321	13:-:52167954-52168321	ENSG00000285160	-	-	AL139082.2	-	0.20439	0.12299	0.15796	0.14204	0.11985	5.69171	0.16176	8.82064	9.13645	0.13991
ENSG00000106031	3.62075	0.0234202	up	7:-:27193503-27200106	7:-:27193503-27200106	ENSG00000106031	3209	P31271	HOXA13	homeobox A13 [Source:HGNC Symbol;Acc:HGNC:5102]	0.2588	0.74395	0	0.0137	0.23588	1.53415	0.17389	0.36913	0.37633	1.23166
ENSG00000005073	3.61552	0.0191626	up	7:-:27181510-27185223	7:-:27181510-27185223	ENSG00000005073	3207	P31270	HOXA11	homeobox A11 [Source:HGNC Symbol;Acc:HGNC:5101]	0.39123	0.94561	0	0.0151	0.9062	1.38231	0.6377	1.59716	0.65344	0.66953
ENSG00000230798	3.56812	0.00133656	up	1:-:63320884-63324441	1:-:63320884-63324441	ENSG00000230798	100996301	-	FOXD3-AS1	FOXD3 antisense RNA 1 (head to head)	0.10118	1.89582	0.10312	0.07933	1.12455	4.08482	3.21712	1.14019	3.18291	3.72938
ENSG00000099954	3.55329	0.000685337	up	22:+:17359949-17558149	22:+:17359949-17558149	ENSG00000099954	27443	Q9BXF3	CECR2	CECR2, histone acetyl-lysine reader [Source:HGNC Symbol;Acc:HGNC:1840]	0.04806	0.17332	0.04322	0.19838	0.02624	2.35719	1.03858	0.55855	0.21883	0.73058
ENSG00000006377	3.52834	0.00745012	up	7:+:97005548-97011039	7:+:97005548-97011039	ENSG00000006377	1750	P56179	DLX6	distal-less homeobox 6 [Source:HGNC Symbol;Acc:HGNC:2919]	0.15538	0.1496	0.01926	1.27302	0.22763	3.68479	0.19725	2.20278	1.23758	6.29465
ENSG00000251381	3.47706	0.00109206	up	11:-:12961842-12989548	11:-:12961842-12989548	ENSG00000251381	100506305	-	LINC00958	long intergenic non-protein coding RNA 958	0.52742	0.44156	3.60823	0.14266	0.1629	5.17441	3.61194	1.37555	6.40343	8.86217
ENSG00000270460	3.46207	0.00971635	up	2:+:173811076-173811392	2:+:173811076-173811392	ENSG00000270460	-	-	AC106900.2	-	0.05932	0.94232	0	0.49466	0	1.16076	0.91209	1.107	0.26716	0.6226
ENSG00000254271	3.45564	0.0293992	up	10:+:60734342-60741828	10:+:60734342-60741828	ENSG00000254271	-	-	AC022390.1	-	0	0.35457	0.30615	0.80291	0	1.04349	1.56754	0.40428	5.71759	0.19772
ENSG00000230316	3.43831	0.0133215	up	7:+:122303658-122310077	7:+:122303658-122310077	ENSG00000230316	154860	-	FEZF1-AS1	FEZF1 antisense RNA 1	0.09365	0.06557	1.02771	0.03155	0.11982	0.50122	0.17198	0.99566	1.6795	9.00072
ENSG00000123388	3.41252	0.0176255	up	12:+:53973126-53977643	12:+:53973126-53977643	ENSG00000123388	3227	O43248	HOXC11	homeobox C11 [Source:HGNC Symbol;Acc:HGNC:5123]	0.33691	0.06099	0.02543	0	0.37554	0.49414	0.11981	0.32244	0.44874	2.06578
ENSG00000197061	3.31319	0.00997107	up	6:+:26103876-26104310	6:+:26103876-26104310	ENSG00000197061	8364	P62805	HIST1H4C	histone cluster 1 H4 family member c [Source:HGNC Symbol;Acc:HGNC:4787]	0	0.66589	0.15273	0.20027	0	0.39041	0.93836	1.43191	0.46726	0.39453
ENSG00000278592	3.31005	0.00943295	up	7:+:27187819-27188021	7:+:27187819-27188021	ENSG00000278592	-	-	RF02141	-	0.46315	1.20396	0	0.04291	0.52145	1.99853	0.4608	1.90153	3.04552	1.14133
ENSG00000212952	3.24302	0.00556888	up	9:+:42568865-42569315	9:+:42568865-42569315	ENSG00000212952	-	-	BX088651.1	-	0.70879	0.24085	0	0.15453	0.35206	0.50208	1.26333	0.64192	1.85906	2.28322
ENSG00000271969	3.21438	0.0074847	up	12:+:6964949-6965382	12:+:6964949-6965382	ENSG00000271969	-	-	U47924.1	-	0.04333	0.08343	0	0.70255	0.54878	0.58696	0.39188	0.7075	1.44403	0.79089
ENSG00000267868	3.19922	0.00239034	up	13:-:112964835-112966131	13:-:112964835-112966131	ENSG00000267868	-	-	AL356740.1	-	0.04349	0.94917	0.05122	0.21494	0.08161	0.37827	0.95726	0.66964	1.91974	2.051
ENSG00000284627	3.18708	0.0439644	up	7:-:97928082-97928300	7:-:97928082-97928300	ENSG00000284627	-	-	AC079781.4	-	9.4448	16.0373	6.48429	0.07956	0.08056	11.2013	7.30015	10.4555	10.2479	5.01545
ENSG00000104899	3.16752	0.0236777	up	19:+:2249309-2252073	19:+:2249309-2252073	ENSG00000104899	268	P03971	AMH	anti-Mullerian hormone [Source:HGNC Symbol;Acc:HGNC:464]	0.98852	17.866	0.41731	6.53958	0.14662	34.7418	22.6519	1.39377	18.7059	13.4671
ENSG00000274641	3.11746	0.0100708	up	6:+:27893463-27893843	6:+:27893463-27893843	ENSG00000274641	8348	P23527	HIST1H2BO	histone cluster 1 H2B family member o [Source:HGNC Symbol;Acc:HGNC:4758]	0.04935	0.42765	0	0.38871	0.09261	1.33723	0.26784	0.27631	0.4668	1.50902
ENSG00000274798	3.11464	0.00371918	up	15:+:40874433-40874595	15:+:40874433-40874595	ENSG00000274798	-	-	AC025166.1	-	0	0.22213	0.05095	0.10689	0.16235	0.17365	0.41737	0.16147	2.28613	1.21083
ENSG00000100362	2.95259	0.0210936	up	22:-:36800684-36819479	22:-:36800684-36819479	ENSG00000100362	5816	A0A024R1K9	PVALB	parvalbumin [Source:HGNC Symbol;Acc:HGNC:9704]	0.18804	0.88796	0.02373	0.24061	0	0.38638	0.68031	0.34256	1.28246	0.34324
ENSG00000272161	2.94956	0.0235225	up	1:-:2326201-2326693	1:-:2326201-2326693	ENSG00000272161	-	-	AL589739.1	-	0	0.20197	0	0.08835	0.85885	0.34448	0.13799	0.58724	1.15097	0.34812
ENSG00000055732	2.92791	0.0121834	up	1:-:85018082-85048499	1:-:85018082-85048499	ENSG00000055732	55283	Q8TDD5	MCOLN3	mucolipin 3 [Source:HGNC Symbol;Acc:HGNC:13358]	0.07524	0.0533	0.16426	0.31832	0.49147	0.09545	1.00408	1.84387	1.95135	2.85303
ENSG00000242156	2.91346	0.00814251	up	22:-:29419155-29423193	22:-:29419155-29423193	ENSG00000242156	-	-	AC000041.1	-	0.53725	0.10345	0.04745	0	0.10081	0.48522	0.92328	0.65171	0.09679	1.42201
ENSG00000183248	2.91081	0.00730163	up	19:-:7868719-7874379	19:-:7868719-7874379	ENSG00000183248	80164	Q9H6K5	PRR36	proline rich 36 [Source:HGNC Symbol;Acc:HGNC:26172]	0.10128	0.53426	0.03727	0.15445	0.11086	0.34089	0.26336	0.41935	2.49738	3.23333
ENSG00000254338	2.90169	0.0260126	up	8:+:143417679-143419150	8:+:143417679-143419150	ENSG00000254338	104326051	-	MAFA-AS1	MAFA antisense RNA 1	0	0.95512	0.6771	0.9401	0.46538	0.95028	0.55061	3.34509	2.59961	8.43707
ENSG00000207175	2.8966	0.00947471	up	X:+:119423742-119423905	X:+:119423742-119423905	ENSG00000207175	106480169	-	RNU1-67P	RNA, U1 small nuclear 67, pseudogene [Source:HGNC Symbol;Acc:HGNC:48409]	0.4013	0.38636	0	0.05312	0.21515	0.51777	1.97042	1.23035	0.36148	0.41859
ENSG00000180251	2.86671	0.0320041	up	2:+:102473303-102533972	2:+:102473303-102533972	ENSG00000180251	389015	Q6AI14	SLC9A4	solute carrier family 9 member A4 [Source:HGNC Symbol;Acc:HGNC:11077]	0.19736	0.01617	0.07047	0.39103	0.00788	0.39611	0.09495	0.15673	0.2591	3.25768
ENSG00000204334	2.846	0.0250426	up	2:+:170783786-170798971	2:+:170783786-170798971	ENSG00000204334	285141	A1L162	ERICH2	glutamate rich 2 [Source:HGNC Symbol;Acc:HGNC:44395]	0.96991	0.69283	0	0.21743	0.11742	1.93094	1.03292	0.86124	1.39507	0.27128
ENSG00000233765	2.83149	0.0117924	up	9:-:66253424-66254464	9:-:66253424-66254464	ENSG00000233765	-	-	AL591479.1	-	0.13325	0	0.06539	0.32926	0.12502	0.13372	0.50889	0.49736	1.28036	0.40541
ENSG00000243455	2.83092	0.0172003	up	19:+:18048637-18049090	19:+:18048637-18049090	ENSG00000243455	100271364	-	RPS18P13	ribosomal protein S18 pseudogene 13 [Source:HGNC Symbol;Acc:HGNC:36901]	0.06213	0.05981	0.12804	1.05537	0	0.56111	0.33716	0.15459	0.70886	0.81275
ENSG00000236824	2.82952	0.0452092	up	2:+:47335315-47335514	2:+:47335315-47335514	ENSG00000236824	618	-	BCYRN1	brain cytoplasmic RNA 1	0.04701	0.13578	0.12457	0.17423	1.27907	1.08501	5.10234	0.57024	1.94788	0.12872
ENSG00000270354	2.80242	0.0254426	up	2:-:64208498-64208716	2:-:64208498-64208716	ENSG00000270354	-	-	AC012368.3	-	0	0.08267	0.30336	2.02873	0	1.12013	0.69895	0.56083	0.34804	0.7053
ENSG00000237357	2.78646	0.0373092	up	9:-:42566679-42569353	9:-:42566679-42569353	ENSG00000237357	-	-	BX088651.4	-	0.29529	0.09477	0	0.13174	0.37282	0.09878	0.70564	0.27894	0.84723	0.6089
ENSG00000163710	2.78062	0.0469698	up	3:-:142815922-142889203	3:-:142815922-142889203	ENSG00000163710	26577	Q9UKZ9	PCOLCE2	procollagen C-endopeptidase enhancer 2 [Source:HGNC Symbol;Acc:HGNC:8739]	0.58897	0.03381	0.07636	0.77103	5.97962	10.3052	3.01791	1.05376	4.47789	0.37727
ENSG00000163064	2.76593	0.0200688	up	2:-:118842171-118847678	2:-:118842171-118847678	ENSG00000163064	2019	Q05925	EN1	engrailed homeobox 1 [Source:HGNC Symbol;Acc:HGNC:3342]	0.01303	0.5928	0.04604	0.70634	0.74579	2.18709	0.80148	1.25545	0.35214	1.56696
ENSG00000278334	2.76389	0.0152155	up	7:+:27185832-27186018	7:+:27185832-27186018	ENSG00000278334	-	-	RF02138	-	0.05028	0.09681	0.04441	0	0.09434	1.46317	0.04548	1.73583	0.09058	0.09178
ENSG00000250413	2.76332	0.0422449	up	4:+:10006482-10009725	4:+:10006482-10009725	ENSG00000250413	-	-	AC005674.1	-	0	0.05916	0.34376	0.34163	0.05765	0.57555	0.27791	0.74541	0.05535	1.86952
ENSG00000267327	2.72895	0.0430957	up	18:+:55893038-56023522	18:+:55893038-56023522	ENSG00000267327	-	-	AC009271.1	-	0.14861	0.82031	0.21002	1.3586	0	1.33222	0.44805	0.48071	0.78533	4.12328
ENSG00000168298	2.72373	0.00837338	up	6:+:26156354-26157107	6:+:26156354-26157107	ENSG00000168298	3008	P10412	HIST1H1E	histone cluster 1 H1 family member e [Source:HGNC Symbol;Acc:HGNC:4718]	0.19951	0.14406	0.04406	0.09243	0.0468	0.42545	0.8346	0.74465	0.08986	0.8308
ENSG00000176383	2.7088	0.00860209	up	12:+:122203543-122208952	12:+:122203543-122208952	ENSG00000176383	79369	Q9C0J1	B3GNT4	UDP-GlcNAc:betaGal beta-1,3-N-acetylglucosaminyltransferase 4 [Source:HGNC Symbol;Acc:HGNC:15683]	0.03207	0.04825	0.94908	0.14674	0.06019	0.31383	0.6872	0.22634	1.10332	1.08316
ENSG00000279809	2.69887	0.00464762	up	2:-:233865496-233867359	2:-:233865496-233867359	ENSG00000279809	-	-	AC005538.2	-	0.24211	0.14569	0.1693	0.35987	0.18456	0.74406	2.8103	3.43106	0.58611	0.40512
ENSG00000284738	2.69411	0.034588	up	1:+:153923337-153935240	1:+:153923337-153935240	ENSG00000284738	101928059	-	AL358472.5	uncharacterized LOC101928059	2.19649	0.15718	0.00655	0.08251	1.67094	1.47444	0.41613	0.77551	2.40636	1.52388
ENSG00000204531	2.68752	0.00937672	up	6:-:31164337-31180731	6:-:31164337-31180731	ENSG00000204531	5460	D2IYK3	POU5F1	POU class 5 homeobox 1 [Source:HGNC Symbol;Acc:HGNC:9221]	0.65255	5.89191	0.27815	0.33691	11.8915	5.9913	3.48554	10.0271	8.78781	10.4686
ENSG00000272267	2.64693	0.0370889	up	8:-:9555144-9556520	8:-:9555144-9556520	ENSG00000272267	-	-	AC021242.3	-	0.12973	0.26952	0.25329	0.24041	0.1089	0.73314	0.22232	0.43323	0.7688	17.5548
ENSG00000242265	2.62425	0.0382142	up	7:+:94656325-94669695	7:+:94656325-94669695	ENSG00000242265	23089	Q86TG7	PEG10	paternally expressed 10 [Source:HGNC Symbol;Acc:HGNC:14005]	0.3036	1.21117	0.01614	0.20578	0.14638	1.83931	1.24336	2.55621	1.02049	0.0975
ENSG00000180806	2.59304	0.0112024	up	12:+:53994895-54003337	12:+:53994895-54003337	ENSG00000180806	3225	Q8N561	HOXC9	homeobox C9 [Source:HGNC Symbol;Acc:HGNC:5130]	0.0672	2.77112	0.45504	0.65376	3.17855	2.00611	2.14244	2.69616	6.89025	7.03764
ENSG00000259262	2.54186	0.0489183	up	15:+:90385814-90386063	15:+:90385814-90386063	ENSG00000259262	106480806	-	NDUFA3P4	NADH:ubiquinone oxidoreductase subunit A3 pseudogene 4 [Source:HGNC Symbol;Acc:HGNC:45053]	0	0.07242	0	0.17423	0.21171	1.01897	1.29259	0.03509	0.37264	0.06865
ENSG00000260418	2.51595	0.0128535	up	6:-:136335714-136336087	6:-:136335714-136336087	ENSG00000260418	-	-	AL023284.4	-	0.4525	1.79103	0.88818	0.11647	1.98122	2.32089	5.79811	3.80005	1.08694	7.02092
ENSG00000066248	2.50109	0.0249358	up	2:-:232878686-233013272	2:-:232878686-233013272	ENSG00000066248	25791	Q8N5V2	NGEF	neuronal guanine nucleotide exchange factor [Source:HGNC Symbol;Acc:HGNC:7807]	0.12461	0.16835	0.54144	0.04097	0.37525	0.33682	0.39629	0.62637	0.59019	8.10235
ENSG00000146267	2.49375	0.0389249	up	6:-:99271169-99350062	6:-:99271169-99350062	ENSG00000146267	84553	Q5TGI0	FAXC	failed axon connections homolog [Source:HGNC Symbol;Acc:HGNC:20742]	0.05321	0.12419	0.61026	0.01345	0.68984	0.38024	0.13053	0.63115	2.32242	1.06988
ENSG00000269068	2.48471	0.0324178	up	2:+:219559083-219559626	2:+:219559083-219559626	ENSG00000269068	-	-	AC009955.4	-	0.08641	0.43263	0.06106	0.12811	0.06486	0.91921	0.26575	0.06451	1.69692	1.04109
ENSG00000163888	2.47224	0.00784112	up	3:-:184259213-184261463	3:-:184259213-184261463	ENSG00000163888	94032	Q96S95	CAMK2N2	calcium/calmodulin dependent protein kinase II inhibitor 2 [Source:HGNC Symbol;Acc:HGNC:24197]	0.02761	0.35224	0.64631	0.21107	0.22668	1.43394	0.58691	0.56683	1.38042	0.90725
ENSG00000273980	2.4642	0.0187925	up	10:-:133257144-133257551	10:-:133257144-133257551	ENSG00000273980	-	-	AL592071.1	-	0.09218	0.24405	0.24425	0	0.43241	0.2775	0.75034	0.60207	0.74727	0.54684
ENSG00000274026	2.46147	0.011623	up	9:-:67717411-67719178	9:-:67717411-67719178	ENSG00000274026	100131997	Q08E93,A0A158RFU5	FAM27E3	family with sequence similarity 27 member E3	0.10033	0.02841	0.30236	0.175	0.68664	0.61596	0.40571	0.92521	2.48277	0.38785
ENSG00000105880	2.41044	0.0325491	up	7:-:97020392-97024950	7:-:97020392-97024950	ENSG00000105880	1749	P56178	DLX5	distal-less homeobox 5 [Source:HGNC Symbol;Acc:HGNC:2918]	0.76915	0.86481	0.86465	1.43532	1.87727	16.4355	1.54705	8.1707	0.63469	24.8499
ENSG00000206706	2.39651	0.0350421	up	16:-:16314112-16314211	16:-:16314112-16314211	ENSG00000206706	-	-	RF00019	-	0.09402	0.54312	0.24913	0.5227	5.29269	1.03784	1.9559	1.93005	1.27036	7.46557
ENSG00000231982	2.34463	0.00649962	up	3:+:186826549-186827337	3:+:186826549-186827337	ENSG00000231982	-	-	AC112907.2	-	0.17094	0.49374	0.17615	0.13199	0.24058	0.88631	0.95347	0.55828	2.4124	0.49406
ENSG00000133661	2.34148	0.00401792	up	10:-:79937740-79982614	10:-:79937740-79982614	ENSG00000133661	6441	P35247	SFTPD	surfactant protein D [Source:HGNC Symbol;Acc:HGNC:10803]	0.29892	0.05482	0.57207	0.21103	0.08681	1.45702	0.71456	0.64419	0.67316	0.52617
ENSG00000206927	2.34088	0.0299302	up	16:+:18397937-18398036	16:+:18397937-18398036	ENSG00000206927	-	-	RF00019	-	0.09402	0.63364	0.08304	0.34846	2.91098	0.56609	1.10551	1.84232	1.10098	3.51826
ENSG00000267751	2.31605	0.00712949	up	19:-:567210-572228	19:-:567210-572228	ENSG00000267751	105372233	-	AC009005.1	uncharacterized LOC105372233	0.49998	2.36502	0.18241	1.16826	3.01857	1.57067	5.41694	3.99601	7.4606	3.1646
ENSG00000207294	2.31434	0.0452122	up	16:+:15150697-15150796	16:+:15150697-15150796	ENSG00000207294	-	-	RF00019	-	0	0.4526	0.24913	0.43558	4.05773	0.84914	1.44566	0.96503	1.35505	6.35003
ENSG00000138759	2.27178	0.0013151	up	4:+:78057570-78544269	4:+:78057570-78544269	ENSG00000138759	80144	Q86XX4	FRAS1	Fraser extracellular matrix complex subunit 1 [Source:HGNC Symbol;Acc:HGNC:19185]	0.32183	0.52039	0.09023	0.84037	0.24193	1.21171	1.22984	1.2817	0.63965	3.63476
ENSG00000222460	2.25497	0.0337653	up	20:+:35643143-35643462	20:+:35643143-35643462	ENSG00000222460	106480916	-	RN7SKP271	RNA, 7SK small nuclear pseudogene 271 [Source:HGNC Symbol;Acc:HGNC:45995]	0.11752	0.2263	0	0.13612	0.74428	0.29484	0.39862	0.24674	0.66164	1.15309
ENSG00000260593	2.2543	0.0388106	up	16:-:71623708-71626816	16:-:71623708-71626816	ENSG00000260593	-	-	AC009097.2	-	0	0.3504	0.07144	0.16861	0.30352	0.16232	0.65837	0.283	0.38247	1.18106
ENSG00000239467	2.24954	0.00494792	up	2:+:170771113-170778148	2:+:170771113-170778148	ENSG00000239467	285141	A1L162	AC007405.3	glutamate rich 2	0.22362	0.14041	0.05153	0.36036	0.51996	1.59037	0.64197	1.10683	0.63934	0.41708
ENSG00000272512	2.23561	0.0109514	up	1:-:995966-998051	1:-:995966-998051	ENSG00000272512	-	-	AL645608.8	-	1.31157	0.98504	2.3926	2.05887	0.97261	26.8619	5.19366	2.9818	1.49	12.8511
ENSG00000237758	2.22445	0.00937835	up	2:-:230725143-230725403	2:-:230725143-230725403	ENSG00000237758	100505506	-	BANF1P3	barrier to autointegration factor 1 pseudogene 3 [Source:HGNC Symbol;Acc:HGNC:43883]	0.14409	1.1445	0.19091	1.13484	0.23658	1.40981	2.3459	1.44535	1.1357	1.15072
ENSG00000272989	2.2196	0.00850611	up	3:-:197505262-197506986	3:-:197505262-197506986	ENSG00000272989	100129516	-	LINC02012	long intergenic non-protein coding RNA 2012	0.0763	0.86059	0.25996	0.15151	0.7466	0.85324	1.21766	2.3598	0.60388	1.11928
ENSG00000224680	2.21397	0.0141853	up	1:+:52368677-52369244	1:+:52368677-52369244	ENSG00000224680	100420258	-	PLA2G12AP1	phospholipase A2 group XIIA pseudogene 1 [Source:HGNC Symbol;Acc:HGNC:39248]	0.3476	0.33467	0.10234	0.06135	0.88522	0.4651	1.37739	1.17385	0.83498	0.61941
ENSG00000257084	2.21384	0.000210802	up	12:+:6963246-6964447	12:+:6963246-6964447	ENSG00000257084	105369635	-	MIR200CHG	MIR200C and MIR141 host gene	1.90724	1.06037	3.22687	1.89166	2.64634	8.35664	5.92843	6.09094	10.8646	8.26239
ENSG00000259306	2.20676	0.0307911	up	15:+:51315841-51321996	15:+:51315841-51321996	ENSG00000259306	-	-	AC020891.2	-	0.14539	0.15164	0.37456	0.41537	0.0341	0.48634	0.70135	0.62179	0.16371	1.57026
ENSG00000284740	2.20188	0.00851368	up	1:+:1503250-1509452	1:+:1503250-1509452	ENSG00000284740	-	-	AL645728.2	-	0.56981	0.78176	0.46555	0.39598	1.21625	0.72906	2.60271	1.60838	8.44339	2.76936
ENSG00000174938	2.2006	0.000132634	up	16:-:29871159-29899547	16:-:29871159-29899547	ENSG00000174938	26470	Q6UXD5	SEZ6L2	seizure related 6 homolog like 2 [Source:HGNC Symbol;Acc:HGNC:30844]	2.20063	2.39844	1.65887	1.01953	2.12695	15.3621	5.29063	3.96811	5.70167	11.4665
ENSG00000267022	2.18989	0.0412233	up	19:+:44025354-44087318	19:+:44025354-44087318	ENSG00000267022	-	-	AC067968.1	-	0.09487	0.22594	0.51159	0.01388	0.09603	0.20042	0.12419	1.12982	0.89053	0.36913
ENSG00000271888	2.18285	0.00358706	up	6:-:15243923-15245000	6:-:15243923-15245000	ENSG00000271888	-	-	AL136162.1	-	0.2006	0.13435	0.12326	0.19395	0.13911	0.62141	0.32343	0.32553	1.83051	0.57314
ENSG00000200525	2.16605	0.00734802	up	8:+:95055214-95055320	8:+:95055214-95055320	ENSG00000200525	106480095	-	RNU6-1209P	RNA, U6 small nuclear 1209, pseudogene [Source:HGNC Symbol;Acc:HGNC:48172]	0.08787	0.25379	0.15522	0.32567	0.16488	0.79359	0.47685	0.32796	0.55405	0.48118
ENSG00000206129	2.15705	0.0148387	up	18:-:56003613-56191262	18:-:56003613-56191262	ENSG00000206129	-	-	AC006305.1	-	0.14051	1.32578	0.2565	1.50739	0.18164	2.27177	0.77385	1.02269	1.02664	5.84519
ENSG00000256968	2.14326	0.0154736	up	9:-:6748703-6748981	9:-:6748703-6748981	ENSG00000256968	414153	-	SNRPEP2	small nuclear ribonucleoprotein polypeptide E pseudogene 2 [Source:HGNC Symbol;Acc:HGNC:20733]	0.0337	0.32444	0.11906	0.31224	0.22132	0.43962	0.64008	0.40878	0.54639	0.64589
ENSG00000237903	2.14224	0.039177	up	X:+:119422917-119423547	X:+:119422917-119423547	ENSG00000237903	-	-	AC004000.1	-	0.04343	0.35539	0.21097	0.1006	0.10186	0.52295	0.8445	0.95226	0.15647	0.19818
ENSG00000197084	2.12402	0.00445556	up	1:-:152804835-152806628	1:-:152804835-152806628	ENSG00000197084	353133	Q5T751	LCE1C	late cornified envelope 1C [Source:HGNC Symbol;Acc:HGNC:29464]	0.47553	2.02754	3.12016	1.19595	5.37937	12.3117	5.59144	4.81752	6.05807	6.47304
ENSG00000227953	2.12381	0.0153907	up	1:+:246776013-246792385	1:+:246776013-246792385	ENSG00000227953	149134	-	LINC01341	long intergenic non-protein coding RNA 1341 [Source:HGNC Symbol;Acc:HGNC:49457]	0.26195	0.52485	0.4419	0.14213	0.34541	0.56837	0.37994	1.41151	5.92239	0.91325
ENSG00000167807	2.09292	0.00494185	up	19:-:10305427-10316009	19:-:10305427-10316009	ENSG00000167807	-	-	AC011511.1	-	1.05715	1.23436	0.11523	0.59606	0.6331	1.16921	1.98153	1.96027	4.74915	1.25637
ENSG00000231871	2.09008	0.0301831	up	1:-:201688259-201829559	1:-:201688259-201829559	ENSG00000231871	100873949	-	IPO9-AS1	IPO9 antisense RNA 1	0.33209	0.27	0.24118	0.04103	0.04847	0.33326	0.62745	0.35808	1.46247	0.17512
ENSG00000228175	2.07433	0.00105983	up	1:-:89993593-89994321	1:-:89993593-89994321	ENSG00000228175	492303	-	GEMIN8P4	gem nuclear organelle associated protein 8 pseudogene 4 [Source:HGNC Symbol;Acc:HGNC:37979]	0.59326	0.22351	1.07081	0.65725	0.67762	1.66955	1.38815	1.7209	2.8114	2.80152
ENSG00000260941	2.07148	0.0151338	up	1:-:119597702-119599271	1:-:119597702-119599271	ENSG00000260941	644242	-	LINC00622	long intergenic non-protein coding RNA 622	0.1018	1.24537	0.19042	0.51049	0.64613	2.45187	1.85786	1.67077	0.42076	1.42108
ENSG00000254854	2.05632	0.0114528	up	11:+:119729583-119739623	11:+:119729583-119739623	ENSG00000254854	102724301	-	AP003390.1	uncharacterized LOC102724301	0.14381	0.83077	0.17466	0.43308	1.02885	1.8942	1.17071	2.78453	0.68012	1.05008
ENSG00000154342	2.04124	0.0366193	up	1:+:228007051-228061260	1:+:228007051-228061260	ENSG00000154342	89780	P56704	WNT3A	Wnt family member 3A [Source:HGNC Symbol;Acc:HGNC:15983]	0.25653	5.53862	0.51265	1.05181	0.64083	3.25652	6.79268	3.00112	0.57192	6.86607
ENSG00000100167	2.03771	0.0153486	up	22:+:41969475-41998221	22:+:41969475-41998221	ENSG00000100167	55964	Q9UH03	SEPT3	septin 3 [Source:HGNC Symbol;Acc:HGNC:10750]	0.22739	0.35813	0.3866	0.12423	0.49328	1.82947	0.17001	0.80211	1.25503	2.86237
ENSG00000259704	2.03613	0.0347171	up	15:+:90839724-90841378	15:+:90839724-90841378	ENSG00000259704	-	-	AC124248.1	-	0.07016	0.83314	0.28921	1.2569	1.25076	1.59596	1.92501	1.02569	2.67555	0.93923
ENSG00000245648	2.02082	0.005918	up	12:+:10363769-10398506	12:+:10363769-10398506	ENSG00000245648	101928100	-	AC022075.1	uncharacterized LOC101928100	1.29234	1.29223	1.28235	0.69262	1.8141	1.26354	7.27189	2.60399	11.6442	4.39669
ENSG00000100116	2.01729	0.00066017	up	22:+:37807905-37817176	22:+:37807905-37817176	ENSG00000100116	23464	A8K228	GCAT	glycine C-acetyltransferase [Source:HGNC Symbol;Acc:HGNC:4188]	1.48356	4.48296	2.50238	2.76171	5.17781	7.07618	13.4632	15.1984	12.8042	6.55412
ENSG00000182272	2.00418	0.0103173	up	11:+:369796-382116	11:+:369796-382116	ENSG00000182272	338707	Q76KP1	B4GALNT4	beta-1,4-N-acetyl-galactosaminyltransferase 4 [Source:HGNC Symbol;Acc:HGNC:26315]	0.92494	11.2975	6.21784	9.00344	19.1293	32.6446	14.5952	15.3183	20.6446	53.4877
ENSG00000114923	2.00334	0.0403685	up	2:+:219627327-219641980	2:+:219627327-219641980	ENSG00000114923	6508	P48751	SLC4A3	solute carrier family 4 member 3 [Source:HGNC Symbol;Acc:HGNC:11029]	1.27981	0.81434	0.60191	0.59207	0.80744	0.42439	0.96715	2.32981	8.15465	15.5593
ENSG00000224965	1.98352	0.0152662	up	1:-:110208834-110209987	1:-:110208834-110209987	ENSG00000224965	100873974	-	KCNC4-AS1	KCNC4 antisense RNA 1 (head to head) [Source:HGNC Symbol;Acc:HGNC:39958]	0.67874	0.37515	0.18874	0.16305	0.10614	1.13522	1.12552	0.56297	1.40396	0.2868
ENSG00000236423	1.97602	0.0228486	up	1:+:3900372-3917225	1:+:3900372-3917225	ENSG00000236423	100133612	-	LINC01134	long intergenic non-protein coding RNA 1134	0.22672	0.08464	0.07969	0.23794	0.58822	0.1718	0.79724	0.26768	1.68589	1.19088
ENSG00000272832	1.97165	0.0144336	up	3:-:133543064-133543466	3:-:133543064-133543466	ENSG00000272832	-	-	AC022296.3	-	0.27996	0.15723	0.08243	0.54042	0.08755	0.37459	0.40093	0.566	1.32395	0.40457
ENSG00000130822	1.96652	0.0355291	up	X:-:153669730-153689010	X:-:153669730-153689010	ENSG00000130822	139728	Q6P2M8	PNCK	pregnancy up-regulated nonubiquitous CaM kinase [Source:HGNC Symbol;Acc:HGNC:13415]	0.0277	0.60987	0.31645	0.11465	0.3708	0.35212	0.20379	0.57728	1.26595	1.4698
ENSG00000108947	1.96484	0.02704	up	17:+:7705202-7711378	17:+:7705202-7711378	ENSG00000108947	1949	Q15768	EFNB3	ephrin B3 [Source:HGNC Symbol;Acc:HGNC:3228]	0.29764	0.52817	0.84282	0.32986	0.18617	0.63544	0.31672	1.27156	1.34054	7.6756
ENSG00000124399	1.96388	0.0212311	up	4:+:43898962-43899351	4:+:43898962-43899351	ENSG00000124399	402175	-	NDUFB4P12	NADH:ubiquinone oxidoreductase subunit B4 pseudogene 12 [Source:HGNC Symbol;Acc:HGNC:45260]	0.09643	0.13926	0.46846	0.78181	0.31666	0.94349	1.26468	0.78732	1.38979	0.37405
ENSG00000185272	1.96271	0.0124262	up	21:+:14216130-14228372	21:+:14216130-14228372	ENSG00000185272	54033	P57052	RBM11	RNA binding motif protein 11 [Source:HGNC Symbol;Acc:HGNC:9897]	0.58961	0.24548	0.04926	0.93022	0.37004	1.17936	0.48285	0.56504	1.16988	2.54161
ENSG00000176387	1.96008	0.0259757	up	16:+:67430652-67437553	16:+:67430652-67437553	ENSG00000176387	3291	P80365	HSD11B2	hydroxysteroid 11-beta dehydrogenase 2 [Source:HGNC Symbol;Acc:HGNC:5209]	1.29038	1.55041	1.34473	0.36814	3.58256	4.57985	1.25619	1.55184	13.2578	10.8114
ENSG00000197149	1.94646	0.0181023	up	11:+:17228279-17229151	11:+:17228279-17229151	ENSG00000197149	-	-	AC107956.1	-	0.07539	0.22811	0.1522	0.41911	0.20209	0.50795	0.47731	0.18089	1.26114	1.21885
ENSG00000228415	1.94316	0.0405269	up	6:+:30633632-30633956	6:+:30633632-30633956	ENSG00000228415	5758	-	PTMAP1	prothymosin alpha pseudogene 1 [Source:HGNC Symbol;Acc:HGNC:9624]	0.49179	0.47349	0.22997	0.08041	0.10857	0.34837	0.52332	0.35092	1.45928	0.58088
ENSG00000268751	1.9266	0.000687426	up	19:-:34576733-34577701	19:-:34576733-34577701	ENSG00000268751	643719	-	SCGB1B2P	secretoglobin family 1B member 2, pseudogene [Source:HGNC Symbol;Acc:HGNC:20741]	1.15997	0.36737	0.37747	0.62226	0.47256	1.89924	1.53236	1.43842	1.86979	1.69951
ENSG00000111981	1.92421	0.0227683	up	6:+:149964007-149973710	6:+:149964007-149973710	ENSG00000111981	80329	Q9BZM6	ULBP1	UL16 binding protein 1 [Source:HGNC Symbol;Acc:HGNC:14893]	0.21545	0.31979	0.21144	0.13863	0.39305	1.91581	0.15157	0.60869	0.62804	2.47711
ENSG00000241484	1.92199	0.00472552	up	22:+:44752558-44862788	22:+:44752558-44862788	ENSG00000241484	23779	Q6PJW1	ARHGAP8	Rho GTPase activating protein 8 [Source:HGNC Symbol;Acc:HGNC:677]	1.35847	2.6521	0.97523	6.08065	9.69265	8.06411	10.4893	5.60309	18.1618	11.2397
ENSG00000179178	1.91222	0.0113411	up	1:+:43269994-43274002	1:+:43269994-43274002	ENSG00000179178	128218	Q96AQ2	TMEM125	transmembrane protein 125 [Source:HGNC Symbol;Acc:HGNC:28275]	0.60557	0.42132	2.52218	0.40138	2.99015	1.2154	2.9106	3.3904	3.31277	5.20838
ENSG00000273248	1.90173	0.0426131	up	10:-:75408973-75409326	10:-:75408973-75409326	ENSG00000273248	-	-	AC010997.5	-	0.53118	0.35799	1.03219	0.09844	0.09967	0.53305	0.76871	0.39652	1.45936	1.38171
ENSG00000275542	1.87535	0.0177883	up	17:-:81339183-81339691	17:-:81339183-81339691	ENSG00000275542	-	-	AC027601.3	-	0.14777	1.70725	0.73418	0.78729	0.32928	1.81654	2.57289	1.15479	1.03159	2.24222
ENSG00000284485	1.85592	0.0379643	up	1:+:209432133-209432242	1:+:209432133-209432242	ENSG00000284485	406988	-	MIR205	microRNA 205 [Source:HGNC Symbol;Acc:HGNC:31583]	1.28207	29.7892	13.8911	10.3747	32.7184	19.8133	30.0729	19.9385	75.1436	49.7705
ENSG00000196459	1.85299	0.00965978	up	X:-:13712244-13734635	X:-:13712244-13734635	ENSG00000196459	6399	P0DI82	TRAPPC2	trafficking protein particle complex 2 [Source:HGNC Symbol;Acc:HGNC:23068]	3.88268	0.57955	0.32908	0.49357	3.35108	2.9261	2.76965	4.55096	3.72073	3.05194
ENSG00000225518	1.84438	0.0221111	up	1:+:226083639-226090292	1:+:226083639-226090292	ENSG00000225518	105373113	-	LINC01703	long intergenic non-protein coding RNA 1703 [Source:HGNC Symbol;Acc:HGNC:52491]	0.10307	0.59538	0.46529	0.33955	0.90253	1.88468	0.5179	0.60908	2.56857	1.44238
ENSG00000142233	1.84107	0.00345785	up	19:-:48661407-48673081	19:-:48661407-48673081	ENSG00000142233	126147	Q8WTR8	NTN5	netrin 5 [Source:HGNC Symbol;Acc:HGNC:25208]	0.35615	1.01126	0.14663	0.64043	0.45876	1.54169	0.80808	0.72662	1.98744	2.06883
ENSG00000213612	1.81902	0.0262882	up	9:+:97121659-97122489	9:+:97121659-97122489	ENSG00000213612	100507415	-	FAM220CP	family with sequence similarity 220 member C, pseudogene [Source:HGNC Symbol;Acc:HGNC:43640]	0.46387	0.20696	0.13991	0.04193	0.2123	0.27249	0.29677	0.35894	0.90703	0.69186
ENSG00000186007	1.81808	0.0352569	up	1:-:205381378-205457091	1:-:205381378-205457091	ENSG00000186007	93273	Q68G75	LEMD1	LEM domain containing 1 [Source:HGNC Symbol;Acc:HGNC:18725]	0.29074	0.90561	0.98188	0.36843	4.15585	2.54	3.02413	1.84316	0.83959	7.62116
ENSG00000257553	1.81136	0.0143647	up	12:-:56104614-56113905	12:-:56104614-56113905	ENSG00000257553	-	-	AC034102.4	-	0.73655	1.68942	0.76539	0.92335	1.9309	2.76091	5.68233	5.4174	4.03939	1.02815
ENSG00000251491	1.80756	0.0256433	up	2:+:158862311-158863285	2:+:158862311-158863285	ENSG00000251491	26645	-	OR7E28P	olfactory receptor family 7 subfamily E member 28 pseudogene [Source:HGNC Symbol;Acc:HGNC:8400]	0.09643	1.54116	0.9795	2.12652	1.529	2.35147	2.15432	3.8871	2.18024	2.50833
ENSG00000092621	1.79682	0.000384722	up	1:+:119648411-119744226	1:+:119648411-119744226	ENSG00000092621	26227	O43175	PHGDH	phosphoglycerate dehydrogenase [Source:HGNC Symbol;Acc:HGNC:8923]	2.18394	3.9765	3.31475	3.05572	6.44192	18.0397	12.9602	16.339	8.87794	7.00864
ENSG00000261159	1.78477	0.00857752	up	3:-:128859716-128860526	3:-:128859716-128860526	ENSG00000261159	-	-	AC112484.3	-	1.21726	3.63865	0.46079	4.49007	1.93608	3.78094	3.72242	4.01328	11.5705	5.31162
ENSG00000276529	1.78261	0.00122224	up	21:+:44978832-44979274	21:+:44978832-44979274	ENSG00000276529	-	-	AP001505.1	-	6.79142	10.4823	5.36133	6.60743	4.81878	11.7138	30.3107	19.0906	29.2689	11.816
ENSG00000261889	1.78143	0.00335434	up	16:-:3156736-3157483	16:-:3156736-3157483	ENSG00000261889	-	-	AC108134.2	-	0.26396	0.50827	0.34417	0.45421	0.76654	1.08476	1.0232	0.87964	2.32106	1.29635
ENSG00000204060	1.77963	0.0108784	up	1:+:41361922-41383590	1:+:41361922-41383590	ENSG00000204060	100132074	A0A1X9RU27,A8MYZ6	FOXO6	forkhead box O6 [Source:HGNC Symbol;Acc:HGNC:24814]	0.49401	2.31395	1.97741	4.46478	2.93548	10.1156	2.50365	9.88147	3.87076	6.41974
ENSG00000151224	1.77919	0.0144015	up	10:-:80271820-80289684	10:-:80271820-80289684	ENSG00000151224	4143	Q00266	MAT1A	methionine adenosyltransferase 1A [Source:HGNC Symbol;Acc:HGNC:6903]	0.20638	0.06869	0.4186	0.45801	1.08053	1.18128	0.4033	1.25056	1.05347	0.9116
ENSG00000271781	1.75082	0.00697509	up	5:+:675826-676616	5:+:675826-676616	ENSG00000271781	-	-	AC026740.1	-	1.08163	3.52466	1.02887	1.46478	1.95158	4.35366	6.52575	5.46785	6.30629	1.73575
ENSG00000188818	1.74804	0.00712755	up	5:-:795606-850986	5:-:795606-850986	ENSG00000188818	79844	Q9H8X9	ZDHHC11	zinc finger DHHC-type containing 11 [Source:HGNC Symbol;Acc:HGNC:19158]	0.77211	1.61954	0.36428	1.65135	1.98041	5.86069	1.634	2.01376	7.3582	2.35848
ENSG00000273036	1.74682	0.0157981	up	9:-:38540567-38542792	9:-:38540567-38542792	ENSG00000273036	-	-	AL390726.5	-	0.41018	0.16628	0.13348	0.78014	0.43549	0.42246	0.59557	0.93672	2.69337	0.77831
ENSG00000267296	1.73813	0.0166252	up	19:+:33302857-33305054	19:+:33302857-33305054	ENSG00000267296	80054	-	CEBPA-AS1	CEBPA antisense RNA 1 (head to head)	0.50046	1.15724	0.40804	1.03841	0.70633	3.47692	1.31544	0.55879	1.99974	6.11766
ENSG00000271723	1.73784	0.00611353	up	1:+:54641786-54742308	1:+:54641786-54742308	ENSG00000271723	100527960	A0A0A0MT08,F8WC02	MROH7-TTC4	MROH7-TTC4 readthrough (NMD candidate) [Source:HGNC Symbol;Acc:HGNC:49180]	1.51172	0.63453	0.27057	0.92768	0.72037	6.15731	0.99552	1.07775	2.30779	2.55255
ENSG00000203875	1.73135	0.0128451	up	6:-:85660950-85678736	6:-:85660950-85678736	ENSG00000203875	387066	-	SNHG5	small nucleolar RNA host gene 5	26.8428	9.08761	25.0649	14.8696	12.4045	24.1816	91.5615	55.9221	136.293	22.067
ENSG00000234432	1.72469	0.0149461	up	7:-:5426277-5428927	7:-:5426277-5428927	ENSG00000234432	100129484	-	AC092171.3	uncharacterized LOC100129484	0.44686	1.04144	1.53809	0.21031	0.8119	1.20294	1.29595	1.09207	3.96458	2.49244
ENSG00000073067	1.72349	0.0320604	up	7:+:983199-989640	7:+:983199-989640	ENSG00000073067	54905	Q8TAV3	CYP2W1	cytochrome P450 family 2 subfamily W member 1 [Source:HGNC Symbol;Acc:HGNC:20243]	0.20343	1.025	0.25755	0.64716	0.31811	0.99691	0.38027	2.56577	0.47339	3.60512
ENSG00000152669	1.72191	0.00293208	up	5:-:55231152-55233680	5:-:55231152-55233680	ENSG00000152669	10309	P22674	CCNO	cyclin O [Source:HGNC Symbol;Acc:HGNC:18576]	3.84598	1.66628	1.03748	3.14946	7.65084	6.31602	6.46842	7.30353	14.9672	7.06792
ENSG00000100302	1.71978	0.0322828	up	22:+:35540868-35554001	22:+:35540868-35554001	ENSG00000100302	23551	Q96D21	RASD2	RASD family member 2 [Source:HGNC Symbol;Acc:HGNC:18229]	1.81314	6.61654	0.68149	0.75831	2.5026	18.8117	5.08689	2.32437	1.84175	7.18027
ENSG00000234694	1.71438	0.00737395	up	1:-:43354684-43358658	1:-:43354684-43358658	ENSG00000234694	105378687	-	AL139289.2	uncharacterized LOC105378687	0.62584	0.38344	0.35178	0.72487	0.52046	1.96977	0.81051	0.87597	3.30562	0.98663
ENSG00000163794	1.7119	0.00676743	up	2:-:27307400-27308445	2:-:27307400-27308445	ENSG00000163794	7349	P55089	UCN	urocortin [Source:HGNC Symbol;Acc:HGNC:12516]	3.76075	3.30198	1.96382	4.97492	0.96533	10.1826	7.78722	6.75352	11.3773	2.92514
ENSG00000272896	1.70498	0.0186156	up	9:+:136791379-136800595	9:+:136791379-136800595	ENSG00000272896	-	-	AL355987.3	-	0.07675	0.11084	0.24857	0.32002	0.28804	0.21822	0.67106	0.63261	0.54156	0.5137
ENSG00000169750	1.70242	0.0127924	up	17:+:82031624-82034204	17:+:82031624-82034204	ENSG00000169750	5881	P60763	RAC3	Rac family small GTPase 3 [Source:HGNC Symbol;Acc:HGNC:9803]	0.84968	3.79981	2.02308	6.18996	2.28183	2.57653	10.4586	9.77263	4.83629	10.6997
ENSG00000187187	1.70203	0.0100983	up	19:+:39984134-40021041	19:+:39984134-40021041	ENSG00000187187	339327	B3KVL3	ZNF546	zinc finger protein 546 [Source:HGNC Symbol;Acc:HGNC:28671]	0.6357	0.20904	0.38447	0.11316	0.17727	0.25454	0.78742	0.52499	1.00703	1.3519
ENSG00000203618	1.69719	0.0497733	up	22:+:19722945-19724771	22:+:19722945-19724771	ENSG00000203618	2812	P13224	GP1BB	glycoprotein Ib platelet beta subunit [Source:HGNC Symbol;Acc:HGNC:4440]	0.67805	2.33731	1.27267	1.18361	0.76681	0.42527	9.36908	4.40625	2.87392	4.58617
ENSG00000250644	1.69176	0.0125135	up	11:-:1734821-1763954	11:-:1734821-1763954	ENSG00000250644	-	-	AC068580.4	-	0.25426	2.33502	0.82405	0.78109	2.25529	2.91075	2.79512	4.26512	1.81643	1.96364
ENSG00000123009	1.68985	0.0466363	up	12:+:120282303-120282716	12:+:120282303-120282716	ENSG00000123009	283458	O60361	NME2P1	NME/NM23 nucleoside diphosphate kinase 2 pseudogene 1 [Source:HGNC Symbol;Acc:HGNC:31358]	0.31794	0.21865	0.70207	0.12625	0.42614	0.31905	1.37624	0.86882	1.92293	0.43527
ENSG00000204314	1.68858	0.00675089	up	6:-:32148359-32153083	6:-:32148359-32153083	ENSG00000204314	100507547	Q99946,A2ABC7,A0A024RCX2	PRRT1	uncharacterized LOC100507547	0.96145	1.93209	0.40742	0.62166	0.46649	3.57679	1.44937	1.95358	3.05954	0.89939
ENSG00000162391	1.68604	0.0444477	up	1:-:54609182-54623556	1:-:54609182-54623556	ENSG00000162391	338094	Q8WW52	FAM151A	family with sequence similarity 151 member A [Source:HGNC Symbol;Acc:HGNC:25032]	0.49237	0.23476	0.4059	1.62066	0.32117	4.99744	0.78889	2.74784	0.81523	0.44083
ENSG00000261183	1.6857	0.000395971	up	15:-:40835808-40844387	15:-:40835808-40844387	ENSG00000261183	102724362	-	SPINT1-AS1	SPINT1 antisense RNA 1	2.29925	4.87302	2.60058	4.05697	4.84843	6.81537	10.8238	7.46304	14.286	10.7628
ENSG00000125850	1.68432	0.0116575	up	20:-:17956979-18059188	20:-:17956979-18059188	ENSG00000125850	58495	Q9BRP0	OVOL2	ovo like zinc finger 2 [Source:HGNC Symbol;Acc:HGNC:15804]	0.4755	1.74797	2.63451	1.506	2.8471	6.31597	4.43376	1.80703	3.29806	8.48643
ENSG00000237149	1.68246	0.0181547	up	10:+:75401519-75408982	10:+:75401519-75408982	ENSG00000237149	100131213	A6NEH8	ZNF503-AS2	ZNF503 antisense RNA 2	0.41	0.54074	0.71188	0.28883	1.19618	1.5274	1.74498	0.68391	0.82717	5.18763
ENSG00000143147	1.66208	0.0101487	up	1:-:168079543-168137667	1:-:168079543-168137667	ENSG00000143147	23432	Q8N6U8	GPR161	G protein-coupled receptor 161 [Source:HGNC Symbol;Acc:HGNC:23694]	0.55453	3.31546	1.14978	0.37799	1.72981	4.09709	2.93818	1.59764	2.18819	5.85785
ENSG00000134253	1.66153	0.00229416	up	1:-:117111060-117122587	1:-:117111060-117122587	ENSG00000134253	80263	Q9H8W5	TRIM45	tripartite motif containing 45 [Source:HGNC Symbol;Acc:HGNC:19018]	0.96429	1.12735	0.91638	0.47268	1.08447	2.50561	1.29466	1.31755	2.92578	5.24729
ENSG00000271579	1.64729	0.0199923	up	12:-:115299588-115300708	12:-:115299588-115300708	ENSG00000271579	-	-	AC078880.3	-	0.10903	0.46027	0.20002	0.1632	0.15738	0.42083	1.04687	0.41478	0.52884	0.31385
ENSG00000273014	1.64153	0.0262665	up	7:+:32758882-32759353	7:+:32758882-32759353	ENSG00000273014	-	-	AC018645.2	-	0.95612	3.66298	1.09084	0.31376	1.682	2.83847	1.33324	2.82519	5.77762	3.47244
ENSG00000196337	1.64121	0.0122592	up	19:-:49054275-49058860	19:-:49054275-49058860	ENSG00000196337	94027	A0A0F7RQF0	CGB7	chorionic gonadotropin beta subunit 7 [Source:HGNC Symbol;Acc:HGNC:16451]	0.2027	1.10142	0.45127	1.36874	0.38036	0.86659	1.29844	0.94829	1.85839	3.15266
ENSG00000237512	1.64013	0.0189771	up	10:-:71217224-71218228	10:-:71217224-71218228	ENSG00000237512	728978	-	UNC5B-AS1	UNC5B antisense RNA 1	0.34575	0.74259	2.24349	0.54216	1.63447	2.26865	2.93487	1.62554	1.49736	3.71403
ENSG00000229299	1.63519	0.00968463	up	20:+:63744689-63745958	20:+:63744689-63745958	ENSG00000229299	-	-	AL121845.1	-	0.71861	0.34594	0.22921	0.59187	0.29966	0.94149	1.35412	0.67054	1.69021	0.7652
ENSG00000104901	1.63357	0.0237483	up	19:+:49361783-49375116	19:+:49361783-49375116	ENSG00000104901	27120	Q9UK85	DKKL1	dickkopf like acrosomal protein 1 [Source:HGNC Symbol;Acc:HGNC:16528]	0.19306	0.50185	0.13073	0.08348	0.16302	0.34872	0.1979	0.97878	0.3594	0.71069
ENSG00000164237	1.62956	0.00726989	up	5:-:10275875-10308026	5:-:10275875-10308026	ENSG00000164237	134147	Q96DG6	CMBL	carboxymethylenebutenolidase homolog [Source:HGNC Symbol;Acc:HGNC:25090]	7.04574	2.33652	1.50149	0.85439	1.76211	6.3609	3.51515	5.36301	10.2602	4.29056
ENSG00000204789	1.62401	0.00695555	up	6:-:27357825-27360221	6:-:27357825-27360221	ENSG00000204789	7754	-	ZNF204P	zinc finger protein 204, pseudogene [Source:HGNC Symbol;Acc:HGNC:12995]	2.23574	1.01585	0.51275	2.23514	1.12978	7.12834	4.61205	2.70472	1.44861	3.46896
ENSG00000267750	1.61481	0.0475393	up	17:-:44299574-44315315	17:-:44299574-44315315	ENSG00000267750	101926996	-	RUNDC3A-AS1	RUNDC3A antisense RNA 1 [Source:HGNC Symbol;Acc:HGNC:51344]	0.10963	0.1223	0.16446	0.13866	0.1453	0.07683	0.14008	0.51797	1.29316	0.53523
ENSG00000111490	1.6121	0.00886536	up	12:+:64781193-64881032	12:+:64781193-64881032	ENSG00000111490	23329	Q9Y2I9	TBC1D30	TBC1 domain family member 30 [Source:HGNC Symbol;Acc:HGNC:29164]	0.35659	0.23656	0.1959	0.0826	0.36007	1.35501	0.33532	0.59447	0.48476	0.41675
ENSG00000164638	1.60699	0.03583	up	7:+:5274369-5306870	7:+:5274369-5306870	ENSG00000164638	222962	Q7RTT9	SLC29A4	solute carrier family 29 member 4 [Source:HGNC Symbol;Acc:HGNC:23097]	0.11326	0.71033	0.53591	0.49922	0.89411	0.35233	1.30244	0.73221	1.75036	3.1439
ENSG00000273032	1.60175	0.0475396	up	22:+:19017834-19020248	22:+:19017834-19020248	ENSG00000273032	25787	-	DGCR9	DiGeorge syndrome critical region gene 9 (non-protein coding)	0.68908	0.30361	0.60865	0.27055	0.36161	0.45319	0.34156	0.63935	4.24329	2.64007
ENSG00000226862	1.59909	0.0320472	up	1:+:202604268-202605293	1:+:202604268-202605293	ENSG00000226862	-	-	AC104463.2	-	0.14971	0.23062	0.23803	0.6936	0.28093	0.5709	1.05622	1.34109	0.53943	0.3826
ENSG00000137825	1.59749	0.0161446	up	15:+:41493393-41503551	15:+:41493393-41503551	ENSG00000137825	3706	P23677	ITPKA	inositol-trisphosphate 3-kinase A [Source:HGNC Symbol;Acc:HGNC:6178]	0.60222	3.26685	1.31791	5.31357	0.65779	3.71173	5.28039	3.70293	2.67188	5.17246
ENSG00000171084	1.5944	0.00917487	up	3:+:125916620-125930024	3:+:125916620-125930024	ENSG00000171084	100125556	Q05BU3	FAM86JP	family with sequence similarity 86, member A pseudogene	0.44789	1.07086	0.68901	0.26975	1.20463	2.2473	1.29972	0.85675	1.76172	2.40503
ENSG00000171224	1.58989	0.0337235	up	10:+:69630251-69633599	10:+:69630251-69633599	ENSG00000171224	219738	A0A024QZL0	FAM241B	family with sequence similarity 241 member B [Source:HGNC Symbol;Acc:HGNC:23519]	0.56453	5.43521	2.95488	1.91151	6.25131	2.28704	5.35197	8.72093	6.5982	13.0403
ENSG00000230091	1.58631	0.00594918	up	10:-:80046860-80078912	10:-:80046860-80078912	ENSG00000230091	219347	-	TMEM254-AS1	TMEM254 antisense RNA 1 [Source:HGNC Symbol;Acc:HGNC:27340]	0.66514	1.08174	1.21735	0.62741	2.85043	4.76556	1.31976	2.56367	3.28183	2.78107
ENSG00000260442	1.58354	0.0253989	up	16:-:28878957-28879920	16:-:28878957-28879920	ENSG00000260442	100289092	-	ATP2A1-AS1	ATP2A1 antisense RNA 1	0.61281	0.31053	0.39884	0.65748	0.84731	1.11665	1.42947	1.74556	3.16682	0.42685
ENSG00000088881	1.57749	0.00140828	up	20:+:2692878-2760108	20:+:2692878-2760108	ENSG00000088881	57593	E9PEI2	EBF4	early B cell factor 4 [Source:HGNC Symbol;Acc:HGNC:29278]	5.39779	12.174	3.4518	6.76865	3.61199	21.9793	8.09209	11.5887	15.4685	28.1674
ENSG00000184113	1.57329	0.0115131	up	22:-:19523024-19527545	22:-:19523024-19527545	ENSG00000184113	7122	O00501	CLDN5	claudin 5 [Source:HGNC Symbol;Acc:HGNC:2047]	1.30513	1.80564	0.90818	1.92829	1.27597	11.1931	4.64007	3.48718	2.17839	1.50902
ENSG00000115598	1.57003	0.0483355	up	2:+:102186973-102240002	2:+:102186973-102240002	ENSG00000115598	8808	Q9HB29	IL1RL2	interleukin 1 receptor like 2 [Source:HGNC Symbol;Acc:HGNC:5999]	0.80364	0.1164	0.6533	0.10544	0.10342	0.36398	0.39882	1.231	0.29469	1.00935
ENSG00000271659	1.56901	0.0426688	up	9:+:95514045-95514520	9:+:95514045-95514520	ENSG00000271659	-	-	AL161729.4	-	0.33578	1.16002	0.33148	0.54905	1.2787	0.69374	1.64361	0.62664	3.87868	2.77624
ENSG00000186493	1.56472	0.0314124	up	5:+:2752131-2755397	5:+:2752131-2755397	ENSG00000186493	153571	Q86SI9	C5orf38	chromosome 5 open reading frame 38 [Source:HGNC Symbol;Acc:HGNC:24226]	0.35165	1.55177	0.60396	0.75123	0.85233	2.19086	2.38551	0.45574	3.64719	2.15754
ENSG00000273084	1.56268	0.0115624	up	7:+:5428731-5429672	7:+:5428731-5429672	ENSG00000273084	-	-	AC092171.5	-	0.7785	0.8264	0.79342	0.22195	0.54313	0.77122	1.50759	1.12689	1.87002	2.0223
ENSG00000169885	1.5619	0.0401426	up	1:+:1914827-1917296	1:+:1914827-1917296	ENSG00000169885	163688	Q8TD86	CALML6	calmodulin like 6 [Source:HGNC Symbol;Acc:HGNC:24193]	0.45774	0.61621	1.06265	0.59303	0.84373	0.63008	2.76991	1.17174	6.73948	0.86144
ENSG00000187123	1.55845	0.0452504	up	2:+:149329985-149474148	2:+:149329985-149474148	ENSG00000187123	130574	Q86Y78	LYPD6	LY6/PLAUR domain containing 6 [Source:HGNC Symbol;Acc:HGNC:28751]	0.62953	0.59891	0.25905	0.10558	0.57487	1.05353	1.29763	0.77916	0.22717	2.2966
ENSG00000278817	1.55842	0.000188978	up	KI270734.1:+:131494-137392	KI270734.1:+:131494-137392	ENSG00000278817	102724770	X5D7D2	AC007325.4	protein DGCR6	2.53455	1.98502	2.58102	2.75065	2.55253	6.07474	3.71564	6.78404	5.87178	9.15414
ENSG00000239670	1.55359	0.0370856	up	1:+:32986952-32988233	1:+:32986952-32988233	ENSG00000239670	-	-	AL355864.2	-	0.68635	0.26222	0.20208	0.31293	2.3305	1.0714	1.85253	1.82982	0.64769	0.93468
ENSG00000284820	1.55084	0.0156449	up	2:-:219209772-219222738	2:-:219209772-219222738	ENSG00000284820	-	-	AC068946.2	-	1.07194	1.87598	1.23181	0.48665	2.18973	2.7846	1.68457	8.4468	1.58401	3.69258
ENSG00000224652	1.54908	0.0327236	up	3:+:196142636-196160890	3:+:196142636-196160890	ENSG00000224652	401109	-	LINC00885	long intergenic non-protein coding RNA 885	0.1543	2.34718	0.76775	0.37172	0.44878	1.20259	0.91645	0.94065	2.01997	1.75566
ENSG00000108830	1.54698	0.0481191	up	17:+:43025241-43032036	17:+:43025241-43032036	ENSG00000108830	8153	P52198	RND2	Rho family GTPase 2 [Source:HGNC Symbol;Acc:HGNC:18315]	0.3607	0.25162	0.10493	0.27818	0.47824	0.10404	0.5763	1.53572	0.97473	1.03297
ENSG00000197763	1.54572	0.00572988	up	3:-:126607052-126655155	3:-:126607052-126655155	ENSG00000197763	114112	Q86VQ6	TXNRD3	thioredoxin reductase 3 [Source:HGNC Symbol;Acc:HGNC:20667]	0.7263	0.66371	1.351	0.49047	1.35999	4.10751	1.54212	1.09124	2.22053	2.44934
ENSG00000197847	1.53442	0.0211149	up	11:+:65213840-65242757	11:+:65213840-65242757	ENSG00000197847	440044	A6NK97	SLC22A20P	solute carrier family 22 member 20, pseudogene	0.36352	0.95679	0.9987	0.68897	1.68317	1.26494	0.8711	1.29953	4.0825	5.33654
ENSG00000182393	1.53088	0.0467289	up	19:+:39296325-39298673	19:+:39296325-39298673	ENSG00000182393	282618	Q8IU54	IFNL1	interferon lambda 1 [Source:HGNC Symbol;Acc:HGNC:18363]	0.21941	0.07394	0.58141	0.9047	0.61758	1.33212	0.43661	1.18747	0.52376	1.12145
ENSG00000159387	1.52894	0.0334926	up	16:+:55323760-55330760	16:+:55323760-55330760	ENSG00000159387	79190	P78412	IRX6	iroquois homeobox 6 [Source:HGNC Symbol;Acc:HGNC:14675]	0.4398	2.72438	1.36819	1.57624	4.60132	8.00815	5.87192	5.11046	1.59215	3.0068
ENSG00000273027	1.52391	0.0204074	up	21:-:44929653-44930112	21:-:44929653-44930112	ENSG00000273027	-	-	AL844908.2	-	0.38834	0.84616	0.48743	0.68178	0.23012	1.55881	0.88736	0.53401	1.5097	1.66026
ENSG00000235169	1.52129	0.0104011	up	1:+:3772761-3775982	1:+:3772761-3775982	ENSG00000235169	388588	B2RUZ4	SMIM1	small integral membrane protein 1 (Vel blood group) [Source:HGNC Symbol;Acc:HGNC:44204]	1.03507	0.80277	0.28782	0.93243	0.75533	1.95238	1.7944	3.09423	1.45899	0.79601
ENSG00000186973	1.51342	0.0236375	up	1:+:43145153-43156396	1:+:43145153-43156396	ENSG00000186973	440585	A6NL82	FAM183A	family with sequence similarity 183 member A [Source:HGNC Symbol;Acc:HGNC:34347]	3.34586	2.14756	1.28064	5.24969	11.4581	3.04424	10.0977	11.6036	15.6622	7.72606
ENSG00000157021	1.51021	0.00758984	up	15:+:41163162-41164374	15:+:41163162-41164374	ENSG00000157021	729073	-	FAM92A1P1	family with sequence similarity 92 member A1 pseudogene 1 [Source:HGNC Symbol;Acc:HGNC:32278]	0.69722	2.91901	2.07144	0.96904	2.03184	3.47714	3.42067	3.88376	4.11082	2.94072
ENSG00000151575	1.50736	0.0265323	up	15:+:56244009-56445997	15:+:56244009-56445997	ENSG00000151575	374618	Q8N6V9	TEX9	testis expressed 9 [Source:HGNC Symbol;Acc:HGNC:29585]	0.41055	0.22275	0.09216	0.31946	0.84806	0.60206	0.60215	0.28573	1.9155	0.92643
ENSG00000234602	1.50366	0.0258559	up	5:-:55219614-55227315	5:-:55219614-55227315	ENSG00000234602	345643	D6RGH6	MCIDAS	multiciliate differentiation and DNA synthesis associated cell cycle protein [Source:HGNC Symbol;Acc:HGNC:40050]	0.58453	0.22511	0.26212	0.37496	2.18525	1.2634	0.92725	0.57899	1.49049	2.11347
ENSG00000170421	1.50156	0.00251151	up	12:-:52897187-52949954	12:-:52897187-52949954	ENSG00000170421	3856	P05787	KRT8	keratin 8 [Source:HGNC Symbol;Acc:HGNC:6446]	12.938	21.8979	31.7019	24.5763	32.4233	98.8561	60.8596	42.3527	32.2934	122.185
ENSG00000261437	1.49389	0.0296288	up	8:-:94637285-94639467	8:-:94637285-94639467	ENSG00000261437	100288748	-	AC108860.2	uncharacterized LOC100288748	0.15505	0.70906	0.3652	0.33122	0.88898	0.99838	0.68561	0.44206	1.15611	2.5197
ENSG00000258645	1.49365	0.00840759	up	14:+:63601509-63601814	14:+:63601509-63601814	ENSG00000258645	326300	-	HSPE1P2	heat shock protein family E (Hsp10) member 1 pseudogene 2 [Source:HGNC Symbol;Acc:HGNC:20052]	2.61163	2.45527	1.65546	3.98569	5.44835	7.92409	11.2274	3.46905	6.6424	8.18852
ENSG00000115457	1.49085	0.00487432	up	2:+:216632828-216664436	2:+:216632828-216664436	ENSG00000115457	3485	P18065	IGFBP2	insulin like growth factor binding protein 2 [Source:HGNC Symbol;Acc:HGNC:5471]	11.9895	54.0213	58.9115	36.1329	25.4309	71.321	87.9593	116.87	47.6591	150.905
ENSG00000204147	1.48724	0.0253553	up	10:+:50739318-50816495	10:+:50739318-50816495	ENSG00000204147	653308	P0C7U1	ASAH2B	N-acylsphingosine amidohydrolase 2B [Source:HGNC Symbol;Acc:HGNC:23456]	0.5132	0.07558	0.76662	0.80556	0.55789	2.21904	0.668	0.73798	1.03457	0.9912
ENSG00000167695	1.47883	0.00161141	up	17:+:732412-742972	17:+:732412-742972	ENSG00000167695	79850	Q8TBR7	FAM57A	family with sequence similarity 57 member A [Source:HGNC Symbol;Acc:HGNC:29646]	2.78281	5.79789	2.87624	2.83603	6.49674	7.33444	11.6603	7.48263	15.4761	7.56015
ENSG00000275936	1.47867	0.0161523	up	12:+:120224744-120225421	12:+:120224744-120225421	ENSG00000275936	-	-	AC004263.1	-	0.83202	0.84111	0.4287	0.96367	0.58547	1.43333	1.51766	0.75049	4.22204	1.4555
ENSG00000124164	1.47817	0.000846619	up	20:+:58389122-58451101	20:+:58389122-58451101	ENSG00000124164	9217	O95292	VAPB	VAMP associated protein B and C [Source:HGNC Symbol;Acc:HGNC:12649]	1.57482	1.73514	1.84212	5.4574	2.26008	4.4086	5.40924	4.64383	8.21142	7.83448
ENSG00000147180	1.47788	0.0127252	up	X:+:85244032-85273362	X:+:85244032-85273362	ENSG00000147180	7552	Q9Y462	ZNF711	zinc finger protein 711 [Source:HGNC Symbol;Acc:HGNC:13128]	1.85257	1.657	0.60076	0.9105	2.07836	3.64462	1.35274	1.72514	8.52321	3.79154
ENSG00000222020	1.47189	0.0246938	up	2:+:239401436-239402364	2:+:239401436-239402364	ENSG00000222020	101928111	-	AC062017.1	uncharacterized LOC101928111	1.19632	0.36917	0.54189	1.56325	0.59	0.52331	1.44275	2.46158	3.23289	2.19777
ENSG00000272692	1.47048	0.0338771	up	10:+:75409157-75411842	10:+:75409157-75411842	ENSG00000272692	-	-	AC010997.4	-	0.12436	0.4071	0.51848	0.5946	0.86811	0.78874	0.71541	0.45954	1.63556	2.18841
ENSG00000226268	1.46838	0.0192305	up	11:-:49433480-49434438	11:-:49433480-49434438	ENSG00000226268	-	-	AC135977.1	-	0.45098	0.28317	0.42431	0.65405	0.23916	0.53127	0.36357	1.3905	0.97142	1.94171
ENSG00000167920	1.46785	0.0048035	up	17:+:40819106-40836274	17:+:40819106-40836274	ENSG00000167920	147184	A0A024R1X7	TMEM99	transmembrane protein 99 [Source:HGNC Symbol;Acc:HGNC:28305]	2.47585	4.72144	1.58213	2.25351	2.26317	5.27668	7.62183	3.85535	12.3056	3.76741
ENSG00000052344	1.46595	0.0097923	up	16:-:31131433-31135762	16:-:31131433-31135762	ENSG00000052344	5652	Q16651	PRSS8	serine protease 8 [Source:HGNC Symbol;Acc:HGNC:9491]	7.54336	22.263	13.0995	3.30519	21.2001	46.6072	30.4361	14.7654	27.4893	35.901
ENSG00000174939	1.46348	0.0186138	up	16:+:29900375-29919864	16:+:29900375-29919864	ENSG00000174939	253982	Q5U4P2	ASPHD1	aspartate beta-hydroxylase domain containing 1 [Source:HGNC Symbol;Acc:HGNC:27380]	1.0451	0.92008	0.47413	0.32781	0.35483	2.9178	0.95632	0.78167	1.9451	0.772
ENSG00000124006	1.46306	0.00539465	up	2:-:219550729-219571859	2:-:219550729-219571859	ENSG00000124006	23363	O75147	OBSL1	obscurin like 1 [Source:HGNC Symbol;Acc:HGNC:29092]	4.55664	5.95051	2.78053	4.37347	2.38724	11.4631	4.39396	5.31617	18.3736	19.0658
ENSG00000151917	1.46289	0.0216914	up	6:+:56955126-57027342	6:+:56955126-57027342	ENSG00000151917	221336	Q5SZJ8	BEND6	BEN domain containing 6 [Source:HGNC Symbol;Acc:HGNC:20871]	0.38025	0.69979	0.3002	0.20423	0.47042	1.81843	0.31197	0.80696	0.55773	2.06082
ENSG00000137434	1.46213	0.0259663	up	6:-:10671418-10694797	6:-:10671418-10694797	ENSG00000137434	347744	Q5T4I8	C6orf52	chromosome 6 open reading frame 52 [Source:HGNC Symbol;Acc:HGNC:20881]	0.31907	1.35165	0.33819	0.72925	0.79829	0.65105	2.28951	2.47112	1.11132	1.21339
ENSG00000274444	1.46194	0.0462709	up	15:+:37109587-37109984	15:+:37109587-37109984	ENSG00000274444	-	-	AC078909.2	-	0.2126	0.81877	0.5425	0.32833	0.33246	0.52153	0.5128	1.36664	2.34069	0.66838
ENSG00000282608	1.46032	0.0162384	up	1:-:111499429-111503760	1:-:111499429-111503760	ENSG00000282608	140	P0DMS8	ADORA3	adenosine A3 receptor [Source:HGNC Symbol;Acc:HGNC:268]	0.78728	0.3133	0.61194	2.21437	0.26263	1.50636	2.03815	0.98602	1.50974	1.42433
ENSG00000198744	1.4571	0.0232514	up	1:+:634376-634922	1:+:634376-634922	ENSG00000198744	107075270	-	MTCO3P12	mitochondrially encoded cytochrome c oxidase III pseudogene 12 [Source:HGNC Symbol;Acc:HGNC:52042]	1.78756	2.31678	1.65481	1.06705	1.64489	2.44928	4.24418	8.83711	4.72223	1.49032
ENSG00000167034	1.4556	0.0290681	up	8:-:23678693-23682927	8:-:23678693-23682927	ENSG00000167034	4824	Q99801	NKX3-1	NK3 homeobox 1 [Source:HGNC Symbol;Acc:HGNC:7838]	1.08074	4.87052	0.79972	0.77768	2.05224	7.10431	2.19162	1.50999	2.44414	7.73901
ENSG00000185414	1.45507	0.00203146	up	2:+:99181079-99197626	2:+:99181079-99197626	ENSG00000185414	51263	Q8TCC3	MRPL30	mitochondrial ribosomal protein L30 [Source:HGNC Symbol;Acc:HGNC:14036]	3.80552	4.20739	3.61636	4.56922	6.4591	5.70067	14.9332	14.0555	6.82083	17.944
ENSG00000224945	1.45009	0.020467	up	9:-:89088604-89109934	9:-:89088604-89109934	ENSG00000224945	-	-	AL353150.1	-	0.61592	1.76156	0.61603	0.33571	0.31443	1.07256	0.81926	1.1579	2.38243	1.54592
ENSG00000135549	1.44937	0.0439934	up	6:+:122471917-122726373	6:+:122471917-122726373	ENSG00000135549	5570	Q9C010	PKIB	cAMP-dependent protein kinase inhibitor beta [Source:HGNC Symbol;Acc:HGNC:9018]	0.46023	0.5697	0.04597	0.42898	0.60915	1.71544	0.40884	0.57004	0.5799	0.87261
ENSG00000238082	1.44898	0.0283181	up	2:+:178454716-178455428	2:+:178454716-178455428	ENSG00000238082	-	-	AC009948.2	-	0.36922	0.46974	0.09318	0.42764	0.18558	0.71457	0.4413	0.33222	0.57015	1.15538
ENSG00000271576	1.44851	0.0117138	up	1:-:84076331-84077931	1:-:84076331-84077931	ENSG00000271576	-	-	AL359504.2	-	1.11577	0.40708	0.31122	1.23518	0.8485	1.36131	0.74363	1.46307	3.57594	1.56508
ENSG00000132329	1.44163	0.025472	up	2:+:237858893-237912114	2:+:237858893-237912114	ENSG00000132329	10267	O60894	RAMP1	receptor activity modifying protein 1 [Source:HGNC Symbol;Acc:HGNC:9843]	12.3276	14.935	21.286	24.4616	7.49154	19.8332	86.8583	65.4986	39.9844	15.09
ENSG00000267390	1.43766	0.00566784	up	18:+:63367328-63381629	18:+:63367328-63381629	ENSG00000267390	-	-	AC036176.1	-	0.88629	1.61436	0.59242	1.66463	1.01134	2.37976	3.22823	1.70989	3.15027	1.94578
ENSG00000131153	1.42786	0.000412484	up	16:-:85676198-85690073	16:-:85676198-85690073	ENSG00000131153	51659	Q9Y248	GINS2	GINS complex subunit 2 [Source:HGNC Symbol;Acc:HGNC:24575]	2.70476	3.66073	4.46007	3.01329	4.87812	8.13125	12.6985	6.81625	9.56661	7.66359
ENSG00000263004	1.42684	0.00669993	up	17:-:57078298-57085024	17:-:57078298-57085024	ENSG00000263004	-	-	AC007114.1	-	1.05565	0.8999	0.48564	1.21249	0.64998	0.99315	1.50186	2.78067	3.01122	1.50546
ENSG00000228519	1.42372	0.031379	up	X:-:25645722-25646327	X:-:25645722-25646327	ENSG00000228519	-	-	AC097263.1	-	0.24823	0.41824	0.19185	0.31626	0.11645	0.34252	0.92617	0.52117	0.51709	0.42481
ENSG00000055118	1.42314	0.0155713	up	7:-:150944961-150978315	7:-:150944961-150978315	ENSG00000055118	3757	Q12809	KCNH2	potassium voltage-gated channel subfamily H member 2 [Source:HGNC Symbol;Acc:HGNC:6251]	0.75349	1.34925	0.63446	3.38117	0.84054	2.46268	1.46868	2.78848	6.29019	1.94488
ENSG00000109881	1.42034	6.82335e-05	up	11:-:27330827-27363868	11:-:27330827-27363868	ENSG00000109881	91057	Q96HJ3	CCDC34	coiled-coil domain containing 34 [Source:HGNC Symbol;Acc:HGNC:25079]	2.846	3.19353	4.10216	3.99758	3.63432	9.06843	8.53124	5.89643	8.28075	11.5465
ENSG00000284753	1.41854	0.00362475	up	3:+:184249650-184259585	3:+:184249650-184259585	ENSG00000284753	110599564	P0DPD7	EEF1AKMT4	EEF1A lysine methyltransferase 4 [Source:NCBI gene;Acc:110599564]	2.69214	3.1878	4.09072	4.31995	4.3888	16.8203	11.1582	5.6401	8.43189	5.13078
ENSG00000211460	1.4129	0.00691739	up	2:+:121737103-121767853	2:+:121737103-121767853	ENSG00000211460	7247	Q15631	TSN	translin [Source:HGNC Symbol;Acc:HGNC:12379]	6.06737	4.49826	2.59667	3.26363	7.67622	16.0845	18.6133	14.0324	6.59345	5.85899
ENSG00000185904	1.40741	0.0338862	up	10:+:42475543-42495336	10:+:42475543-42495336	ENSG00000185904	84856	-	LINC00839	long intergenic non-protein coding RNA 839	5.9863	24.677	4.88956	10.5009	31.778	96.182	32.7602	22.3172	23.1821	15.2492
ENSG00000270673	1.40338	0.014788	up	8:-:63167725-63168442	8:-:63167725-63168442	ENSG00000270673	101410533	-	YTHDF3-AS1	YTHDF3 antisense RNA 1 (head to head)	0.68092	1.26072	1.226	0.80079	0.55286	1.14323	1.82396	1.62507	3.96323	1.63734
ENSG00000275484	1.40218	0.0499468	up	11:+:67374416-67374932	11:+:67374416-67374932	ENSG00000275484	-	-	AP003419.3	-	0.72742	2.08353	0.85133	0.94361	1.58678	0.80297	1.49682	2.40959	7.9121	3.70133
ENSG00000281332	1.39953	0.0298246	up	7:+:32760279-32762924	7:+:32760279-32762924	ENSG00000281332	401321	-	LINC00997	long intergenic non-protein coding RNA 997 [Source:HGNC Symbol;Acc:HGNC:48952]	0.65735	2.48365	0.65281	0.25022	1.7869	2.03246	1.39482	1.75061	2.52535	1.64098
ENSG00000274678	1.39872	0.0445427	up	16:+:30821338-30821884	16:+:30821338-30821884	ENSG00000274678	-	-	AC106886.3	-	0.20626	0.13239	0.24291	0.25482	0.32253	0.20698	0.31093	0.76984	1.14572	0.43925
ENSG00000224023	1.39744	0.0219944	up	10:-:125700436-125719566	10:-:125700436-125719566	ENSG00000224023	399821	-	AL158835.1	uncharacterized LOC399821	0.25477	0.40354	0.09921	0.29952	0.55004	0.66253	0.48565	0.30163	1.298	0.63008
ENSG00000279968	1.39696	0.0308843	up	6:-:138725211-138773652	6:-:138725211-138773652	ENSG00000279968	100507462	A0A096LPI5	GVQW2	GVQW motif containing 2 [Source:HGNC Symbol;Acc:HGNC:51715]	0.49632	0.46575	0.21919	0.33181	0.2122	1.53518	0.46313	0.46899	1.61005	0.32685
ENSG00000150967	1.39556	0.000336143	up	12:-:122920951-122981649	12:-:122920951-122981649	ENSG00000150967	23457	Q9NP78	ABCB9	ATP binding cassette subfamily B member 9 [Source:HGNC Symbol;Acc:HGNC:50]	0.5744	0.75325	0.5011	0.44636	0.42476	1.56101	0.83753	0.88515	1.49105	1.41071
ENSG00000254285	1.39524	0.0190714	up	8:+:61578220-61579668	8:+:61578220-61579668	ENSG00000254285	728638	-	KRT8P3	keratin 8 pseudogene 3 [Source:HGNC Symbol;Acc:HGNC:31056]	0.26603	0.39981	0.52153	0.81765	0.40179	1.41947	0.81576	0.59334	0.64292	2.16749
ENSG00000279535	1.39361	0.0460145	up	8:-:118189455-118189970	8:-:118189455-118189970	ENSG00000279535	-	-	AP003476.1	-	1.78563	4.03479	3.28315	0.86103	3.14552	1.93818	10.8936	6.71574	5.61321	3.37591
ENSG00000278828	1.39024	0.0232331	up	6:+:27810064-27811300	6:+:27810064-27811300	ENSG00000278828	8357	P68431	HIST1H3H	histone cluster 1 H3 family member h [Source:HGNC Symbol;Acc:HGNC:4775]	0.45603	0.62932	0.52364	1.26061	0.48491	2.66954	0.63934	1.36169	0.73942	2.8095
ENSG00000120784	1.38107	0.0379452	up	19:-:37613749-37692337	19:-:37613749-37692337	ENSG00000120784	22835	D3Y2A0	ZFP30	ZFP30 zinc finger protein [Source:HGNC Symbol;Acc:HGNC:29555]	1.74127	2.10175	0.20909	0.32789	1.69325	1.43269	1.23613	1.5394	2.84793	3.00256
ENSG00000105767	1.37866	0.0381864	up	19:-:43622368-43639839	19:-:43622368-43639839	ENSG00000105767	199731	Q8NFZ8	CADM4	cell adhesion molecule 4 [Source:HGNC Symbol;Acc:HGNC:30825]	4.35768	9.78951	16.021	4.02222	4.70906	13.035	4.5132	17.6162	16.052	52.5565
ENSG00000016402	1.37717	0.0279645	up	6:-:136999971-137045180	6:-:136999971-137045180	ENSG00000016402	53832	Q9UHF4	IL20RA	interleukin 20 receptor subunit alpha [Source:HGNC Symbol;Acc:HGNC:6003]	0.86068	3.66672	1.34837	0.77354	2.85895	8.56123	2.55836	3.75216	1.4127	4.36857
ENSG00000198720	1.3722	0.0154207	up	17:+:29589769-29614761	17:+:29589769-29614761	ENSG00000198720	124930	A0A024QZ29	ANKRD13B	ankyrin repeat domain 13B [Source:HGNC Symbol;Acc:HGNC:26363]	1.29036	4.72089	5.12571	1.53127	3.99406	6.25351	5.68569	2.97808	9.15579	12.2504
ENSG00000260265	1.36869	0.010362	up	4:-:75081702-75084717	4:-:75081702-75084717	ENSG00000260265	105377283	-	LINC02562	long intergenic non-protein coding RNA 2562 [Source:HGNC Symbol;Acc:HGNC:53602]	1.52905	6.54581	1.37469	3.37332	3.43282	3.99134	3.87738	8.74748	6.64899	7.45137
ENSG00000226754	1.36716	0.0327851	up	1:+:53238610-53242783	1:+:53238610-53242783	ENSG00000226754	100507564	-	AL606760.1	uncharacterized LOC100507564	0.42193	0.3679	0.14767	0.22867	0.67223	0.49531	1.13769	0.77998	0.96093	0.34877
ENSG00000142530	1.36651	0.0316183	up	19:-:50466785-50476753	19:-:50466785-50476753	ENSG00000142530	112703	Q6IPT2	FAM71E1	family with sequence similarity 71 member E1 [Source:HGNC Symbol;Acc:HGNC:25107]	0.85253	2.63004	0.73711	1.66332	2.10108	1.00615	4.19222	3.89349	6.04083	2.30145
ENSG00000270175	1.3665	0.0218303	up	12:-:53500162-53500936	12:-:53500162-53500936	ENSG00000270175	-	-	AC023509.4	-	0.49739	0.9928	0.51434	0.5508	0.60325	0.88871	1.34965	0.80372	3.21278	1.15153
ENSG00000176912	1.36369	0.0271609	up	18:-:641320-658340	18:-:641320-658340	ENSG00000176912	494514	Q8TAI1	TYMSOS	TYMS opposite strand [Source:HGNC Symbol;Acc:HGNC:29553]	0.54908	0.92746	1.24226	0.97291	1.95222	1.85605	1.72518	1.30336	5.96131	1.98702
ENSG00000165912	1.35786	0.0349238	up	11:-:47177525-47186443	11:-:47177525-47186443	ENSG00000165912	29763	Q9UKS6	PACSIN3	protein kinase C and casein kinase substrate in neurons 3 [Source:HGNC Symbol;Acc:HGNC:8572]	1.45538	16.5481	9.38172	3.77333	9.84366	26.7071	12.8146	8.32347	13.236	15.6874
ENSG00000159685	1.35736	0.0141874	up	3:+:126704220-126960406	3:+:126704220-126960406	ENSG00000159685	84303	Q9BRQ6	CHCHD6	coiled-coil-helix-coiled-coil-helix domain containing 6 [Source:HGNC Symbol;Acc:HGNC:28184]	1.61632	3.63652	4.16875	3.40518	3.01381	5.99286	16.2322	7.99505	4.60388	3.8511
ENSG00000188368	1.35563	0.0169483	up	19:+:42302098-42310821	19:+:42302098-42310821	ENSG00000188368	284338	A6NJB7	PRR19	proline rich 19 [Source:HGNC Symbol;Acc:HGNC:33728]	0.23368	0.46402	0.40635	0.37215	1.01743	0.7035	0.73645	0.6848	1.01629	2.05614
ENSG00000108813	1.35207	0.0438425	up	17:+:49968970-49974959	17:+:49968970-49974959	ENSG00000108813	1748	Q92988	DLX4	distal-less homeobox 4 [Source:HGNC Symbol;Acc:HGNC:2917]	0.28897	2.08662	0.30538	1.60892	0.78916	1.36449	1.55189	0.78003	1.68498	3.86668
ENSG00000232818	1.34962	0.0420101	up	7:+:23490473-23491364	7:+:23490473-23491364	ENSG00000232818	256355	-	RPS2P32	ribosomal protein S2 pseudogene 32	0.69565	0.75095	0.57721	1.02547	0.23734	0.42309	1.39189	1.52445	2.98126	1.06783
ENSG00000272953	1.34847	0.0118106	up	7:+:5425770-5426401	7:+:5425770-5426401	ENSG00000272953	-	-	AC092171.4	-	0.77357	0.73046	0.84096	2.16411	0.79558	1.32865	2.39509	1.40201	3.04189	2.55261
ENSG00000125319	1.34809	0.00745685	up	17:+:44141906-44162476	17:+:44141906-44162476	ENSG00000125319	78995	Q8N3J3	C17orf53	chromosome 17 open reading frame 53 [Source:HGNC Symbol;Acc:HGNC:28460]	1.62069	4.52749	2.14174	1.66114	3.34352	7.52281	9.3076	2.83771	4.60514	4.82884
ENSG00000272172	1.3465	0.0258595	up	8:-:143290399-143290621	8:-:143290399-143290621	ENSG00000272172	-	-	AC138696.2	-	0.92754	0.77124	0.59583	1.17196	0.59335	1.77698	2.05924	0.82615	1.40518	2.57818
ENSG00000175707	1.33534	0.0162861	up	1:-:26949562-26960406	1:-:26949562-26960406	ENSG00000175707	126695	Q8NAX2	KDF1	keratinocyte differentiation factor 1 [Source:HGNC Symbol;Acc:HGNC:26624]	1.442	5.10404	5.60422	3.50796	8.43248	11.9712	10.5718	5.77362	12.9704	6.49925
ENSG00000267480	1.33371	0.0227626	up	18:-:12031178-12032181	18:-:12031178-12032181	ENSG00000267480	-	-	AP001542.3	-	0.30329	0.73859	0.56729	0.39673	0.71975	0.62661	0.96819	1.56482	1.38205	1.09096
ENSG00000235363	1.3323	0.0143483	up	1:+:205351247-205351471	1:+:205351247-205351471	ENSG00000235363	100130289	-	SNRPGP10	small nuclear ribonucleoprotein polypeptide G pseudogene 10 [Source:HGNC Symbol;Acc:HGNC:39329]	1.12822	1.97132	2.36215	4.14284	1.96025	3.48043	5.82045	3.66515	4.36627	5.18681
ENSG00000274825	1.33135	0.0291026	up	20:+:38955910-38956547	20:+:38955910-38956547	ENSG00000274825	-	-	AL023803.2	-	0.51578	0.58171	0.52065	0.27309	0.42861	0.68026	0.93303	0.9213	0.53098	2.0713
ENSG00000141738	1.33027	0.0139889	up	17:+:39737927-39747291	17:+:39737927-39747291	ENSG00000141738	2886	Q14451	GRB7	growth factor receptor bound protein 7 [Source:HGNC Symbol;Acc:HGNC:4567]	1.70682	6.10511	5.31235	3.66676	8.39444	6.81192	11.5466	5.05842	16.3165	15.3325
ENSG00000185480	1.32928	0.00118	up	12:+:102120185-102197520	12:+:102120185-102197520	ENSG00000185480	55010	B4DT40	PARPBP	PARP1 binding protein [Source:HGNC Symbol;Acc:HGNC:26074]	1.09771	1.30295	0.87507	1.31638	1.65083	3.15756	3.48759	2.63096	1.54924	2.81576
ENSG00000262943	1.32923	0.021132	up	17:+:6853861-6954107	17:+:6853861-6954107	ENSG00000262943	245	-	ALOX12P2	arachidonate 12-lipoxygenase pseudogene 2	0.28929	0.60667	0.24377	0.18332	0.41493	0.55892	0.27219	0.61434	0.76528	1.73443
ENSG00000273437	1.32758	0.018801	up	3:-:129163606-129163940	3:-:129163606-129163940	ENSG00000273437	-	-	AC108673.3	-	1.51552	1.35104	1.23947	2.02837	1.0796	3.0417	3.93464	4.05913	3.31178	1.30638
ENSG00000166173	1.32738	0.00488281	up	15:-:70829130-70854159	15:-:70829130-70854159	ENSG00000166173	55323	Q9BRS8	LARP6	La ribonucleoprotein domain family member 6 [Source:HGNC Symbol;Acc:HGNC:24012]	2.331	6.07431	2.55084	2.16143	4.11357	14.0776	5.78308	8.73189	6.54164	4.5254
ENSG00000271133	1.32618	0.0057093	up	7:-:20328299-20331747	7:-:20328299-20331747	ENSG00000271133	101927811	-	AC004130.1	uncharacterized LOC101927811	0.73452	0.54554	0.65805	0.82643	0.63008	1.55845	0.99655	1.4589	2.13617	1.07264
ENSG00000205763	1.3253	0.009597	up	7:-:32916815-32943176	7:-:32916815-32943176	ENSG00000205763	441212	-	RP9P	RP9 pseudogene	3.60197	5.89989	2.90916	1.50158	2.00061	4.06234	5.36464	8.9505	7.65347	4.53907
ENSG00000130751	1.32447	0.00521728	up	19:+:47019820-47045775	19:+:47019820-47045775	ENSG00000130751	4861	Q99742	NPAS1	neuronal PAS domain protein 1 [Source:HGNC Symbol;Acc:HGNC:7894]	0.3969	0.27696	0.76226	0.51284	0.45438	0.7089	1.02758	0.89021	1.16441	0.97709
ENSG00000277534	1.32436	0.0318567	up	18:-:26542971-26545791	18:-:26542971-26545791	ENSG00000277534	-	-	AC007996.1	-	0.72655	1.12628	1.86931	1.64906	6.90119	2.91308	3.83143	2.16758	6.04332	5.17422
ENSG00000181218	1.32282	0.0320662	up	1:-:228456979-228457873	1:-:228456979-228457873	ENSG00000181218	92815	Q7L7L0	HIST3H2A	histone cluster 3 H2A [Source:HGNC Symbol;Acc:HGNC:20507]	4.20195	2.80156	7.72916	8.23464	10.9993	6.63079	10.2902	6.31261	30.9239	27.7856
ENSG00000272902	1.32159	0.0377281	up	2:+:101151660-101155412	2:+:101151660-101155412	ENSG00000272902	100506286	-	TBC1D8-AS1	TBC1 domain family member 8 antisense RNA 1	0.23524	0.23379	0.37534	0.5414	0.2563	0.89476	0.31572	0.26907	0.84759	1.75224
ENSG00000070087	1.32127	0.0130346	up	3:-:149964904-150050788	3:-:149964904-150050788	ENSG00000070087	5217	P35080	PFN2	profilin 2 [Source:HGNC Symbol;Acc:HGNC:8882]	3.31525	5.61275	6.71114	2.55776	2.81046	5.75968	4.98121	7.3244	23.189	9.83835
ENSG00000164542	1.32085	0.0171551	up	7:-:36324221-36390125	7:-:36324221-36390125	ENSG00000164542	23366	Q8NCT3	KIAA0895	KIAA0895 [Source:HGNC Symbol;Acc:HGNC:22206]	0.36473	0.95928	0.67023	0.2991	1.21933	1.49489	0.98715	1.04707	0.75023	2.6478
ENSG00000169519	1.32024	0.037136	up	11:+:28108248-28527041	11:+:28108248-28527041	ENSG00000169519	196074	A6NJ78	METTL15	methyltransferase like 15 [Source:HGNC Symbol;Acc:HGNC:26606]	0.65878	0.80069	0.26158	0.44241	0.5251	0.4003	2.13418	1.49449	0.45514	2.24402
ENSG00000266933	1.31942	0.0458878	up	19:-:490046-507833	19:-:490046-507833	ENSG00000266933	-	-	AC005775.1	-	0.64154	0.35143	0.20517	1.75257	1.29723	0.54389	1.00046	1.6617	1.70377	2.39262
ENSG00000241057	1.31811	0.0280345	up	7:-:43961590-43973323	7:-:43961590-43973323	ENSG00000241057	-	-	AC004951.3	-	0.4013	0.67022	0.50637	0.53878	0.25357	1.26566	0.69631	0.65721	0.53116	2.12286
ENSG00000253313	1.3138	0.0353229	up	1:-:43281883-43285617	1:-:43281883-43285617	ENSG00000253313	149466	Q8IVY1	C1orf210	chromosome 1 open reading frame 210 [Source:HGNC Symbol;Acc:HGNC:28755]	0.66979	0.73443	2.11993	1.0401	2.36821	1.45631	1.4248	1.70714	4.10045	6.3849
ENSG00000241990	1.31285	0.00607093	up	22:+:46053705-46057210	22:+:46053705-46057210	ENSG00000241990	150381	-	PRR34-AS1	PRR34 antisense RNA 1 [Source:HGNC Symbol;Acc:HGNC:50499]	2.06445	1.01038	1.53476	1.42669	2.0015	2.46016	4.69932	2.64874	4.4941	2.30819
ENSG00000225265	1.31006	0.0461483	up	1:+:222589825-222593032	1:+:222589825-222593032	ENSG00000225265	100506161	-	TAF1A-AS1	TAF1A antisense RNA 1	0.67434	0.87398	0.15463	0.5227	0.38935	0.50103	0.59234	0.50823	2.15523	1.78724
ENSG00000248278	1.3087	0.0253472	up	17:-:48874860-48908983	17:-:48874860-48908983	ENSG00000248278	105371814	-	SUMO2P17	uncharacterized LOC105371814	0.52407	0.36329	0.74064	0.75753	0.72772	0.79939	1.36517	1.57463	2.51145	0.64095
ENSG00000121753	1.30598	0.0429229	up	1:-:31727117-31764893	1:-:31727117-31764893	ENSG00000121753	576	O60241	ADGRB2	adhesion G protein-coupled receptor B2 [Source:HGNC Symbol;Acc:HGNC:944]	0.59398	4.00663	0.5739	1.55452	2.05516	2.41469	2.58538	3.00651	1.3136	8.41074
ENSG00000260196	1.30207	0.0126224	up	11:+:17380649-17383531	11:+:17380649-17383531	ENSG00000260196	-	-	AC124798.1	-	0.54135	0.52748	0.91599	1.36581	0.62418	1.97992	0.72857	1.12287	1.59511	3.41697
ENSG00000205309	1.29375	0.0233935	up	17:+:17303335-17347663	17:+:17303335-17347663	ENSG00000205309	56953	Q9NPB1	NT5M	5',3'-nucleotidase, mitochondrial [Source:HGNC Symbol;Acc:HGNC:15769]	1.17943	3.68357	1.27044	0.99066	3.44569	3.76242	2.26366	2.94818	8.0415	2.99748
ENSG00000278603	1.2937	0.0234163	up	15:+:82472203-82472426	15:+:82472203-82472426	ENSG00000278603	-	-	AC245033.3	-	8.14269	4.72804	5.26442	10.7728	36.0328	13.689	14.0466	22.1282	29.2258	21.0697
ENSG00000277806	1.29357	0.0399673	up	19:+:43976815-43977448	19:+:43976815-43977448	ENSG00000277806	-	-	AC006213.4	-	0.97874	1.22787	0.35366	0.41222	0.44523	1.50304	1.44861	0.56734	0.94843	1.98963
ENSG00000206077	1.29198	0.0186415	up	5:-:710360-766952	5:-:710360-766952	ENSG00000206077	653082	P0C7U3,A0A087X1A0,F5H7P5	ZDHHC11B	zinc finger DHHC-type containing 11B	0.4157	0.59474	0.44267	0.66597	0.49756	1.14428	0.58157	2.74246	1.13387	0.57798
ENSG00000173894	1.28898	0.0105667	up	17:+:79778132-79787983	17:+:79778132-79787983	ENSG00000173894	84733	Q14781	CBX2	chromobox 2 [Source:HGNC Symbol;Acc:HGNC:1552]	2.06322	10.4033	4.34716	6.62828	6.4495	23.0058	8.80895	6.13043	11.5308	18.0027
ENSG00000184925	1.28398	0.0433814	up	9:+:136949551-136955497	9:+:136949551-136955497	ENSG00000184925	286256	Q6JVE5	LCN12	lipocalin 12 [Source:HGNC Symbol;Acc:HGNC:28733]	0.94386	1.35186	0.40948	0.40174	1.27983	0.7062	0.93214	1.07367	3.76736	3.20841
ENSG00000275966	1.28367	0.0397875	up	17:-:81345476-81345966	17:-:81345476-81345966	ENSG00000275966	-	-	AC110285.6	-	0.44041	1.71453	0.59197	1.59683	0.61083	1.47961	2.45938	1.4294	0.96592	2.81377
ENSG00000179965	1.28362	0.0031008	up	16:+:30407297-30431108	16:+:30407297-30431108	ENSG00000179965	51333	B2R9V3	ZNF771	zinc finger protein 771 [Source:HGNC Symbol;Acc:HGNC:29653]	1.01908	2.2385	1.13289	1.22707	1.55704	2.50225	4.17426	1.71662	4.02494	2.75686
ENSG00000166813	1.28362	0.0437309	up	15:-:89608789-89655451	15:-:89608789-89655451	ENSG00000166813	374654	Q2M1P5	KIF7	kinesin family member 7 [Source:HGNC Symbol;Acc:HGNC:30497]	1.8424	2.56844	1.10261	1.13751	2.39182	4.24675	0.70568	4.64874	8.29801	4.91257
ENSG00000182195	1.28313	0.00101616	up	X:-:141175745-141177125	X:-:141175745-141177125	ENSG00000182195	23641	O95751	LDOC1	LDOC1, regulator of NFKB signaling [Source:HGNC Symbol;Acc:HGNC:6548]	7.91772	9.06508	6.45233	6.93899	9.90063	15.7135	11.2872	11.8667	28.9395	23.1647
ENSG00000104883	1.28124	0.0392857	up	19:-:7476875-7497449	19:-:7476875-7497449	ENSG00000104883	92960	Q96HA9	PEX11G	peroxisomal biogenesis factor 11 gamma [Source:HGNC Symbol;Acc:HGNC:20208]	0.50665	0.74713	1.25756	2.86425	1.05902	0.84953	2.62774	1.86111	4.17098	2.77452
ENSG00000278000	1.28123	0.0264285	up	18:+:80161752-80162413	18:+:80161752-80162413	ENSG00000278000	-	-	AC139100.2	-	1.81788	3.14495	2.60925	2.06604	3.23797	3.09271	3.71243	4.06843	15.646	4.14797
ENSG00000273026	1.27944	0.0384222	up	1:+:153966516-153966930	1:+:153966516-153966930	ENSG00000273026	-	-	AL358472.3	-	0.33983	0.58892	0.62033	1.72133	0.85023	1.20494	0.67621	1.41636	1.79585	2.81213
ENSG00000225151	1.27891	0.0313439	up	15:-:84199311-84230136	15:-:84199311-84230136	ENSG00000225151	388152	-	GOLGA2P7	golgin A2 pseudogene 7	2.67614	3.82338	0.76032	2.55942	10.7361	5.40564	5.93802	4.74436	11.0658	6.34985
ENSG00000224094	1.27859	0.0335786	up	3:-:45159774-45160175	3:-:45159774-45160175	ENSG00000224094	100216336	-	RPS24P8	ribosomal protein S24 pseudogene 8 [Source:HGNC Symbol;Acc:HGNC:37016]	1.00567	0.78811	1.28078	1.66864	1.18493	1.22044	3.32118	2.37874	4.95082	1.3448
ENSG00000221916	1.27708	0.0400383	up	19:-:49118397-49119140	19:-:49118397-49119140	ENSG00000221916	55150	Q9NVV2	C19orf73	chromosome 19 open reading frame 73 [Source:HGNC Symbol;Acc:HGNC:25534]	0.80876	0.31633	0.60274	1.0304	0.62839	0.90037	0.9144	0.566	3.05068	2.09914
ENSG00000089685	1.27284	0.0107366	up	17:+:78214186-78225636	17:+:78214186-78225636	ENSG00000089685	332	O15392	BIRC5	baculoviral IAP repeat containing 5 [Source:HGNC Symbol;Acc:HGNC:593]	2.12928	4.47735	2.76016	2.2287	3.49609	5.2702	14.2036	5.79728	5.95609	3.45494
ENSG00000126460	1.27177	0.0300628	up	19:+:49580646-49591015	19:+:49580646-49591015	ENSG00000126460	5639	O14669	PRRG2	proline rich and Gla domain 2 [Source:HGNC Symbol;Acc:HGNC:9470]	1.34312	3.66656	4.7161	1.02941	3.71826	3.75511	5.02435	5.63202	2.69357	8.91912
ENSG00000261189	1.27009	0.00902253	up	6:-:7540451-7541338	6:-:7540451-7541338	ENSG00000261189	-	-	AL031058.1	-	0.64585	1.45769	1.05676	1.57947	1.10264	1.43436	2.66226	2.43035	2.65135	2.14528
ENSG00000275234	1.26603	0.0043294	up	19:+:6469465-6470152	19:+:6469465-6470152	ENSG00000275234	-	-	AC010503.4	-	4.03132	10.3545	10.0426	8.15445	8.05186	10.4909	16.773	12.2668	18.1568	23.0742
ENSG00000125743	1.26354	0.00608945	up	19:-:45687454-45692569	19:-:45687454-45692569	ENSG00000125743	6633	P62316	SNRPD2	small nuclear ribonucleoprotein D2 polypeptide [Source:HGNC Symbol;Acc:HGNC:11159]	30.2637	24.3581	23.8546	52.1991	26.266	91.2628	71.0298	75.3885	107.654	31.2186
ENSG00000224550	1.26297	0.0249015	up	1:+:107505203-107505448	1:+:107505203-107505448	ENSG00000224550	-	-	AC114491.1	-	1.22301	1.83983	1.08025	1.66441	2.00807	2.07108	5.04703	2.63902	4.23453	2.09296
ENSG00000259802	1.25851	0.024062	up	5:-:10352701-10353601	5:-:10352701-10353601	ENSG00000259802	-	-	AC012640.2	-	0.38609	1.10512	0.99543	1.91442	1.31191	2.85875	1.95373	1.25606	2.4627	2.05718
ENSG00000229891	1.2572	0.0355759	up	22:-:42364400-42369236	22:-:42364400-42369236	ENSG00000229891	102723775	-	LINC01315	long intergenic non-protein coding RNA 1315	2.50073	5.77983	1.99909	1.56767	7.28946	3.16483	11.6383	6.86188	3.96381	9.74604
ENSG00000233205	1.25642	0.0388378	up	2:+:87972656-87973082	2:+:87972656-87973082	ENSG00000233205	-	-	AC108479.1	-	0.28624	0.89036	0.46676	1.32612	0.76436	1.0385	1.17501	1.3971	2.32056	0.90433
ENSG00000177853	1.25555	0.033477	up	10:+:96129715-96205288	10:+:96129715-96205288	ENSG00000177853	9849	Q6AHZ1	ZNF518A	zinc finger protein 518A [Source:HGNC Symbol;Acc:HGNC:29009]	0.8227	4.12413	2.80144	0.7135	1.15499	4.41988	1.90286	1.67871	5.04442	5.25851
ENSG00000128602	1.25357	0.0248164	up	7:+:129188872-129213545	7:+:129188872-129213545	ENSG00000128602	6608	Q99835	SMO	smoothened, frizzled class receptor [Source:HGNC Symbol;Acc:HGNC:11119]	2.71958	22.9669	2.93188	5.30253	4.90882	10.9669	12.0842	9.57883	8.80106	21.9554
ENSG00000254473	1.25335	0.0304905	up	9:+:83707594-83713378	9:+:83707594-83713378	ENSG00000254473	105376114	B7Z6N6	AL354920.1	uncharacterized LOC105376114	0.70473	0.80622	0.6005	1.08319	1.15904	0.84032	2.16722	0.83552	3.69681	2.12636
ENSG00000140832	1.25208	0.00642374	up	16:+:71626161-71642114	16:+:71626161-71642114	ENSG00000140832	91862	Q96A59	MARVELD3	MARVEL domain containing 3 [Source:HGNC Symbol;Acc:HGNC:30525]	0.93931	1.20768	1.43131	1.21362	2.3565	2.65512	1.80078	2.95063	1.83413	6.54167
ENSG00000101126	1.25138	0.00543125	up	20:-:50888916-50931421	20:-:50888916-50931421	ENSG00000101126	23394	Q9H2P0	ADNP	activity dependent neuroprotector homeobox [Source:HGNC Symbol;Acc:HGNC:15766]	16.1036	5.69255	4.8192	3.99122	4.97767	21.4876	12.0587	11.6612	8.83605	21.8812
ENSG00000173261	1.25026	0.0355837	up	5:-:146084386-146104369	5:-:146084386-146104369	ENSG00000173261	153770	A1L4L8	PLAC8L1	PLAC8 like 1 [Source:HGNC Symbol;Acc:HGNC:31746]	1.13224	0.45536	0.53169	0.73039	1.02196	0.64721	1.45189	1.56469	3.5632	1.07264
ENSG00000274605	1.24971	0.0286287	up	13:-:100086031-100088848	13:-:100086031-100088848	ENSG00000274605	105370333	-	AL355338.1	uncharacterized LOC105370333	1.3799	6.79146	3.04708	8.71159	2.57968	5.384	7.13471	11.1848	5.38012	8.63751
ENSG00000134222	1.2482	0.00485149	up	1:-:109279556-109283186	1:-:109279556-109283186	ENSG00000134222	84722	Q6PGN9	PSRC1	proline and serine rich coiled-coil 1 [Source:HGNC Symbol;Acc:HGNC:24472]	1.70913	3.09765	2.58877	1.23579	4.43066	4.44151	4.25046	4.83665	5.60945	4.70985
ENSG00000152990	1.24451	0.0320329	up	4:-:22345071-22516054	4:-:22345071-22516054	ENSG00000152990	166647	Q8IWK6	ADGRA3	adhesion G protein-coupled receptor A3 [Source:HGNC Symbol;Acc:HGNC:13839]	1.62119	7.98531	2.6242	2.20097	7.4975	9.13197	3.88881	4.2812	11.3604	17.4554
ENSG00000262484	1.23885	0.0261875	up	19:-:38908980-38912158	19:-:38908980-38912158	ENSG00000262484	643669	I3L3R5	CCER2	coiled-coil glutamate rich protein 2 [Source:HGNC Symbol;Acc:HGNC:44662]	0.82722	1.96968	1.67346	1.89561	1.43542	3.15092	1.76997	1.74297	7.08292	3.10934
ENSG00000228847	1.23791	0.0291412	up	X:-:42098754-42099173	X:-:42098754-42099173	ENSG00000228847	654480	-	ATP5MC2P4	ATP synthase membrane subunit c locus 2 pseudogene 4 [Source:HGNC Symbol;Acc:HGNC:42188]	0.94019	0.25863	0.55363	1.05784	0.63008	1.41524	0.68841	1.12795	1.65348	1.24631
ENSG00000253293	1.23615	0.0482506	up	7:-:27170591-27180261	7:-:27170591-27180261	ENSG00000253293	3206	P31260	HOXA10	homeobox A10 [Source:HGNC Symbol;Acc:HGNC:5100]	1.29349	5.28663	1.3486	0.44886	3.21959	5.21758	2.72758	3.20673	2.7918	3.05096
ENSG00000224837	1.22748	0.00771181	up	1:-:168055901-168056422	1:-:168055901-168056422	ENSG00000224837	100329108	-	GCSHP5	glycine cleavage system protein H pseudogene 5 [Source:HGNC Symbol;Acc:HGNC:44195]	2.21538	1.73409	1.0659	1.33511	2.53481	2.44006	3.22562	4.57135	2.98526	3.28779
ENSG00000111057	1.22686	0.0017453	up	12:+:52948871-52952901	12:+:52948871-52952901	ENSG00000111057	3875	A0A024RAY2	KRT18	keratin 18 [Source:HGNC Symbol;Acc:HGNC:6430]	11.5201	21.8789	18.9908	16.2862	23.0973	68.8678	49.2264	38.3551	21.2963	43.2949
ENSG00000177025	1.22627	0.0272665	up	19:-:57958437-57974534	19:-:57958437-57974534	ENSG00000177025	147685	Q8NEA5	C19orf18	chromosome 19 open reading frame 18 [Source:HGNC Symbol;Acc:HGNC:28642]	0.70899	0.6925	0.40841	1.06634	0.26994	0.9074	0.85504	1.09302	2.24916	0.78777
ENSG00000170089	1.22386	0.0149943	up	5:+:177809407-177950732	5:+:177809407-177950732	ENSG00000170089	728554	-	AC106795.1	THO complex 3 pseudogene	1.44006	2.86693	2.91906	2.31359	5.45253	5.6874	4.19014	2.64646	10.4368	8.27592
ENSG00000272338	1.22323	0.0182431	up	8:-:33360839-33361415	8:-:33360839-33361415	ENSG00000272338	-	-	AC067838.1	-	1.87386	3.15329	2.1013	1.91745	0.71853	3.10682	3.37503	4.60694	3.56669	2.55798
ENSG00000126878	1.22239	0.0333872	up	9:+:131096476-131123152	9:+:131096476-131123152	ENSG00000126878	83543	Q9BQI0	AIF1L	allograft inflammatory factor 1 like [Source:HGNC Symbol;Acc:HGNC:28904]	1.52587	2.9433	1.74426	0.75953	2.2906	2.64762	3.24975	1.32447	8.62408	4.46302
ENSG00000143845	1.21785	0.00336143	up	1:-:204131062-204152003	1:-:204131062-204152003	ENSG00000143845	55224	A0A024R9A8	ETNK2	ethanolamine kinase 2 [Source:HGNC Symbol;Acc:HGNC:25575]	1.36865	2.82368	1.85141	1.27012	1.00402	3.09715	3.55217	2.92301	2.05477	4.24451
ENSG00000148498	1.21458	0.0249116	up	10:-:34109560-34815325	10:-:34109560-34815325	ENSG00000148498	56288	Q8TEW0	PARD3	par-3 family cell polarity regulator [Source:HGNC Symbol;Acc:HGNC:16051]	1.79434	8.39875	6.06034	2.45176	5.54217	14.6761	4.5516	6.80905	7.15702	18.9699
ENSG00000226742	1.2118	0.00918526	up	18:+:79964561-79970822	18:+:79964561-79970822	ENSG00000226742	440498	C9JCN9	HSBP1L1	heat shock factor binding protein 1 like 1 [Source:HGNC Symbol;Acc:HGNC:37243]	8.24035	6.61728	8.23173	5.11424	4.00298	13.6568	5.57965	12.5493	11.8303	30.7727
ENSG00000271853	1.21004	0.0219136	up	1:-:153626332-153634340	1:-:153626332-153634340	ENSG00000271853	-	-	AL162258.1	-	3.22215	5.30382	5.38328	5.34953	7.40267	5.97386	10.4098	10.8979	24.7347	5.89036
ENSG00000166681	1.20914	0.0043903	up	X:+:103376340-103378077	X:+:103376340-103378077	ENSG00000166681	27018	Q00994	BEX3	brain expressed X-linked 3 [Source:HGNC Symbol;Acc:HGNC:13388]	53.4949	21.8002	37.8236	33.7574	35.1947	121.536	52.2124	77.9981	112.387	49.3096
ENSG00000111358	1.20853	0.0286958	up	12:+:123633739-123662606	12:+:123633739-123662606	ENSG00000111358	2967	Q13889	GTF2H3	general transcription factor IIH subunit 3 [Source:HGNC Symbol;Acc:HGNC:4657]	2.84926	4.06614	6.86425	3.54262	13.7726	24.2531	5.9672	6.19113	16.8215	11.4028
ENSG00000152284	1.20751	0.0138447	up	2:+:85133410-85310388	2:+:85133410-85310388	ENSG00000152284	83439	Q9HCS4	TCF7L1	transcription factor 7 like 1 [Source:HGNC Symbol;Acc:HGNC:11640]	3.24401	13.6354	3.03468	5.25577	6.91862	20.4879	9.94498	9.97144	6.28176	17.656
ENSG00000128585	1.20587	0.024663	up	7:+:131110096-131496636	7:+:131110096-131496636	ENSG00000128585	4289	B4DG30	MKLN1	muskelin 1 [Source:HGNC Symbol;Acc:HGNC:7109]	0.90091	0.79709	3.69308	1.2765	0.75896	4.14527	1.96848	3.24882	2.54571	1.59522
ENSG00000235043	1.20123	0.0352594	up	4:-:86949669-86950113	4:-:86949669-86950113	ENSG00000235043	442777	-	TECRP1	trans-2,3-enoyl-CoA reductase pseudogene 1 [Source:HGNC Symbol;Acc:HGNC:44050]	1.83812	2.7461	3.13516	2.36877	1.68494	4.07079	8.79055	5.79607	2.8928	2.44899
ENSG00000168255	1.20108	0.0211433	up	7:-:102537918-102572653	7:-:102537918-102572653	ENSG00000168255	548644	Q9GZM3	POLR2J3	RNA polymerase II subunit J3 [Source:HGNC Symbol;Acc:HGNC:33853]	5.74133	6.32219	17.7882	8.56958	11.1993	12.085	13.7849	16.9876	16.4921	60.9017
ENSG00000084764	1.20069	0.00561421	up	2:+:26970612-27027196	2:+:26970612-27027196	ENSG00000084764	22924	Q9UPY8	MAPRE3	microtubule associated protein RP/EB family member 3 [Source:HGNC Symbol;Acc:HGNC:6892]	4.17498	2.90218	6.54704	3.67453	10.3615	10.9651	15.3483	8.13636	8.66982	10.3698
ENSG00000283312	1.19611	0.0472328	up	2:-:231493708-231495299	2:-:231493708-231495299	ENSG00000283312	-	-	AC017104.4	-	0.16536	0.25018	0.3182	0.25172	0.33246	0.36744	0.21367	0.4133	1.19163	0.67916
ENSG00000170122	1.1938	0.00840452	up	9:-:116231-118204	9:-:116231-118204	ENSG00000170122	2298	Q12950	FOXD4	forkhead box D4 [Source:HGNC Symbol;Acc:HGNC:3805]	0.80492	1.339	1.44297	0.64432	1.22441	2.22251	1.46901	2.26657	1.65177	2.40393
ENSG00000135622	1.193	0.000918387	up	2:+:74654228-74683853	2:+:74654228-74683853	ENSG00000135622	10505	O95754	SEMA4F	ssemaphorin 4F [Source:HGNC Symbol;Acc:HGNC:10734]	1.04784	0.75009	0.47343	0.93034	0.87121	1.55001	1.53636	1.58919	1.22677	1.82454
ENSG00000187210	1.19132	0.0273261	up	9:+:76419850-76507416	9:+:76419850-76507416	ENSG00000187210	2650	Q86T81	GCNT1	glucosaminyl (N-acetyl) transferase 1, core 2 [Source:HGNC Symbol;Acc:HGNC:4203]	0.43642	1.63308	0.37905	1.40588	0.96087	2.02917	2.32104	1.70898	1.39032	0.9002
ENSG00000262519	1.19025	0.0489339	up	17:+:4572206-4572515	17:+:4572206-4572515	ENSG00000262519	124974	-	TXNP4	thioredoxin pseudogene 4 [Source:HGNC Symbol;Acc:HGNC:49484]	0.39427	0.3212	0.18752	0.70255	0.42683	0.48696	0.82296	0.7358	0.84691	0.5813
ENSG00000168653	1.18942	0.00304995	up	1:+:39026318-39034636	1:+:39026318-39034636	ENSG00000168653	4725	O43920	NDUFS5	NADH:ubiquinone oxidoreductase subunit S5 [Source:HGNC Symbol;Acc:HGNC:7712]	87.1731	135.862	150.207	163.358	255.234	301.022	531.773	333.132	369.192	219.946
ENSG00000073150	1.18937	0.0238486	up	22:+:50170731-50180294	22:+:50170731-50180294	ENSG00000073150	56666	Q96RD6	PANX2	pannexin 2 [Source:HGNC Symbol;Acc:HGNC:8600]	0.81834	5.76618	2.77082	2.12032	2.71857	3.98444	3.36921	3.40228	6.00096	7.26159
ENSG00000158402	1.18812	0.0127797	up	5:-:138285265-138338355	5:-:138285265-138338355	ENSG00000158402	995	P30307	CDC25C	cell division cycle 25C [Source:HGNC Symbol;Acc:HGNC:1727]	1.0306	1.36656	1.47992	0.76337	2.92977	2.23255	3.11466	1.79087	3.41875	2.6867
ENSG00000109113	1.18689	0.01444	up	17:-:28714281-28718429	17:-:28714281-28718429	ENSG00000109113	83871	A0A024QZ68	RAB34	RAB34, member RAS oncogene family [Source:HGNC Symbol;Acc:HGNC:16519]	5.5365	21.9779	8.6516	5.8348	6.04613	16.6395	25.0999	24.2846	14.6534	11.2574
ENSG00000073670	1.18425	0.0189376	up	17:+:44759031-44781846	17:+:44759031-44781846	ENSG00000073670	4185	O75078	ADAM11	ADAM metallopeptidase domain 11 [Source:HGNC Symbol;Acc:HGNC:189]	0.21879	0.36436	0.27159	0.4785	0.34767	0.63295	0.31734	0.41014	1.15939	0.91748
ENSG00000100197	1.18318	0.00830856	up	22:-:42126499-42130906	22:-:42126499-42130906	ENSG00000100197	1565	Q5Y7H2	CYP2D6	cytochrome P450 family 2 subfamily D member 6 [Source:HGNC Symbol;Acc:HGNC:2625]	5.05307	2.16388	5.69379	3.245	3.72633	3.6805	6.91312	9.01715	8.09812	12.322
ENSG00000228288	1.18276	0.0368395	up	1:+:202810954-202812156	1:+:202810954-202812156	ENSG00000228288	100506696	-	PCAT6	prostate cancer associated transcript 6 (non-protein coding)	0.65496	1.13912	1.58624	0.86137	0.36672	0.87988	1.22303	1.52788	2.42653	2.0344
ENSG00000169020	1.18178	0.0141826	up	4:-:672436-674338	4:-:672436-674338	ENSG00000169020	521	P56385	ATP5ME	ATP synthase membrane subunit e [Source:HGNC Symbol;Acc:HGNC:846]	30.356	37.1035	31.3272	36.7647	45.701	52.3738	139.69	85.7324	119.774	34.6714
ENSG00000076826	1.18046	0.0435498	up	19:+:7595902-7618304	19:+:7595902-7618304	ENSG00000076826	57662	Q9P1Y5	CAMSAP3	calmodulin regulated spectrin associated protein family member 3 [Source:HGNC Symbol;Acc:HGNC:29307]	1.74842	5.93563	4.26449	1.2946	7.76698	7.22467	2.76092	7.51813	10.6016	9.27186
ENSG00000260805	1.17848	0.0152992	up	1:-:212557833-212559731	1:-:212557833-212559731	ENSG00000260805	-	-	AC092803.2	-	0.67333	0.44807	0.31486	0.73399	0.72464	1.25699	0.80158	0.53589	1.4628	1.5183
ENSG00000103876	1.17446	0.00207358	up	15:+:80152490-80186946	15:+:80152490-80186946	ENSG00000103876	2184	P16930	FAH	fumarylacetoacetate hydrolase [Source:HGNC Symbol;Acc:HGNC:3579]	1.43058	2.06349	1.68902	2.41767	2.65504	3.73965	4.55005	3.95715	5.79889	2.80081
ENSG00000029993	1.17393	0.00373947	up	X:+:150980509-150990775	X:+:150980509-150990775	ENSG00000029993	3149	O15347	HMGB3	high mobility group box 3 [Source:HGNC Symbol;Acc:HGNC:5004]	4.60021	9.72055	8.98269	8.13184	7.77159	19.3312	9.6872	27.8271	13.5949	15.7432
ENSG00000142632	1.17073	0.0181721	up	1:-:16197854-16212609	1:-:16197854-16212609	ENSG00000142632	128272	Q8IW93	ARHGEF19	Rho guanine nucleotide exchange factor 19 [Source:HGNC Symbol;Acc:HGNC:26604]	3.64526	24.0693	14.0167	12.2614	25.6579	30.5898	25.3391	29.4041	26.7505	30.5941
ENSG00000256073	1.16556	0.00691348	up	21:+:32393130-32393960	21:+:32393130-32393960	ENSG00000256073	84996	Q96HZ7	URB1-AS1	URB1 antisense RNA 1 (head to head)	2.69271	3.13715	2.11858	3.95219	2.15486	5.08645	6.05813	2.99822	6.7569	5.64846
ENSG00000159259	1.15975	0.00147412	up	21:+:36385378-36419015	21:+:36385378-36419015	ENSG00000159259	8208	Q13112	CHAF1B	chromatin assembly factor 1 subunit B [Source:HGNC Symbol;Acc:HGNC:1911]	3.15967	6.45205	3.40583	4.14643	4.31578	9.87735	12.0995	6.82227	9.07304	6.36961
ENSG00000280594	1.15779	0.0417359	up	21:+:17611744-17633199	21:+:17611744-17633199	ENSG00000280594	110806272	-	BTG3-AS1	BTG3 antisense RNA 1 [Source:HGNC Symbol;Acc:HGNC:53145]	0.40117	0.625	0.19972	0.7806	0.40718	1.13819	0.45191	0.37433	1.20236	1.57443
ENSG00000184281	1.15772	0.0320363	up	11:+:2400488-2403878	11:+:2400488-2403878	ENSG00000184281	10078	Q9Y5U2	TSSC4	tumor suppressing subtransferable candidate 4 [Source:HGNC Symbol;Acc:HGNC:12386]	4.45519	3.01619	6.62731	3.40404	3.92456	5.44308	14.8906	12.6035	2.92388	11.7825
ENSG00000100290	1.15765	0.0389334	up	22:+:43110748-43129712	22:+:43110748-43129712	ENSG00000100290	638	Q13323	BIK	BCL2 interacting killer [Source:HGNC Symbol;Acc:HGNC:1051]	3.96595	6.13597	9.14969	36.4552	8.8304	16.6225	21.7639	12.5289	15.5518	27.7153
ENSG00000182362	1.15624	0.0281185	up	21:+:46286337-46297751	21:+:46286337-46297751	ENSG00000182362	54059	P58557	YBEY	ybeY metallopeptidase (putative) [Source:HGNC Symbol;Acc:HGNC:1299]	4.07917	8.23544	5.2437	4.3582	4.21775	6.74594	12.137	11.5694	20.8375	4.28819
ENSG00000276115	1.15441	0.0436578	up	12:+:32352349-32354144	12:+:32352349-32354144	ENSG00000276115	-	-	AC026356.2	-	0.41879	0.24192	0.14334	0.42685	0.44204	1.15047	0.49717	0.25889	0.66017	0.57813
ENSG00000273145	1.14843	0.0439997	up	22:+:46013606-46015498	22:+:46013606-46015498	ENSG00000273145	-	-	BX537318.1	-	0.24926	0.54747	0.39905	0.71454	1.00855	1.18034	0.81728	0.47971	1.31912	1.32947
ENSG00000071539	1.14713	0.00409013	up	5:+:892643-919357	5:+:892643-919357	ENSG00000071539	9319	Q15645	TRIP13	thyroid hormone receptor interactor 13 [Source:HGNC Symbol;Acc:HGNC:12307]	4.23348	6.00838	3.31944	3.43814	5.84525	14.1471	8.41313	10.2614	8.57611	5.32463
ENSG00000268942	1.14497	0.0247873	up	5:-:62512246-62512482	5:-:62512246-62512482	ENSG00000268942	246715	-	CKS1BP3	CDC28 protein kinase regulatory subunit 1B pseudogene 3 [Source:HGNC Symbol;Acc:HGNC:24233]	1.62648	2.44442	2.24255	2.13195	3.38702	3.94117	4.59282	3.66465	6.36072	3.04141
ENSG00000260428	1.14267	0.00625421	up	8:+:144266560-144268481	8:+:144266560-144268481	ENSG00000260428	642658	Q7RTU7	SCX	scleraxis bHLH transcription factor [Source:HGNC Symbol;Acc:HGNC:32322]	3.90568	8.68953	5.67761	8.12733	7.61144	9.96379	12.9048	8.35144	20.2952	13.0735
ENSG00000260060	1.14159	0.0196851	up	16:+:31196131-31196963	16:+:31196131-31196963	ENSG00000260060	-	-	AC009088.1	-	1.1061	1.06494	0.36886	0.93077	1.17545	1.78957	1.41902	1.06371	2.25706	1.56582
ENSG00000065057	1.14095	0.013773	up	16:-:2039815-2047866	16:-:2039815-2047866	ENSG00000065057	4913	E5KTI5	NTHL1	nth like DNA glycosylase 1 [Source:HGNC Symbol;Acc:HGNC:8028]	3.57116	6.0272	3.3457	7.80099	7.41993	12.7818	13.1478	6.40101	17.8094	6.23632
ENSG00000167900	1.13817	0.0167815	up	17:-:78174075-78187233	17:-:78174075-78187233	ENSG00000167900	7083	P04183	TK1	thymidine kinase 1 [Source:HGNC Symbol;Acc:HGNC:11830]	24.8157	59.3802	28.8446	25.1985	38.2897	96.5038	161.432	61.8256	56.835	36.1597
ENSG00000227252	1.13675	0.0477552	up	2:-:237059434-237085817	2:-:237059434-237085817	ENSG00000227252	-	-	AC105760.2	-	0.39359	0.10827	0.39021	0.20839	0.30145	0.37079	0.32693	0.57712	0.27856	0.95672
ENSG00000176919	1.13585	0.0494603	up	9:+:136945246-136946974	9:+:136945246-136946974	ENSG00000176919	733	P07360	C8G	complement C8 gamma chain [Source:HGNC Symbol;Acc:HGNC:1354]	2.02911	3.93372	1.35434	2.09282	1.57644	1.79669	6.19523	1.67063	5.37586	6.82132
ENSG00000267249	1.13489	0.0232876	up	18:-:12670426-12671145	18:-:12670426-12671145	ENSG00000267249	-	-	AP005482.3	-	0.91407	1.40808	1.51095	1.14945	2.2788	1.9394	1.64173	2.22979	4.52859	2.93188
ENSG00000216866	1.13442	0.0350703	up	X:-:40934982-40935864	X:-:40934982-40935864	ENSG00000216866	286444	-	RPS2P55	ribosomal protein S2 pseudogene 55 [Source:HGNC Symbol;Acc:HGNC:36140]	0.99023	0.94313	0.81822	1.3023	1.32867	1.5707	3.25517	1.34128	3.42407	1.07871
ENSG00000176894	1.13418	0.0033335	up	12:+:132687606-132704991	12:+:132687606-132704991	ENSG00000176894	5827	Q9NR77	PXMP2	peroxisomal membrane protein 2 [Source:HGNC Symbol;Acc:HGNC:9716]	6.81769	9.19984	5.86265	7.26378	7.07321	14.2261	19.617	13.5021	15.4103	8.59331
ENSG00000166145	1.13345	0.0101485	up	15:+:40844018-40858207	15:+:40844018-40858207	ENSG00000166145	6692	O43278	SPINT1	serine peptidase inhibitor, Kunitz type 1 [Source:HGNC Symbol;Acc:HGNC:11246]	13.4764	34.5544	19.631	21.5798	28.5903	103.907	27.7805	25.1449	54.6782	63.1689
ENSG00000161267	1.13325	0.0116167	up	3:-:197509783-197573323	3:-:197509783-197573323	ENSG00000161267	622	Q02338	BDH1	3-hydroxybutyrate dehydrogenase 1 [Source:HGNC Symbol;Acc:HGNC:1027]	1.60927	3.05507	2.83466	1.87633	2.86295	2.74124	3.98323	3.833	10.8507	5.34602
ENSG00000206417	1.13291	0.01822	up	3:+:129315392-129326225	3:+:129315392-129326225	ENSG00000206417	339942	Q4G0G2	H1FX-AS1	H1FX antisense RNA 1 [Source:HGNC Symbol;Acc:HGNC:27953]	1.26733	0.88402	1.13154	0.82276	1.04203	1.05936	1.60132	2.64471	3.7145	1.2671
ENSG00000226332	1.13205	0.00463713	up	20:-:62305432-62306325	20:-:62305432-62306325	ENSG00000226332	-	-	AL354836.1	-	5.83993	15.7114	6.91427	10.5665	8.62685	13.6051	12.2251	16.0902	16.9132	26.9908
ENSG00000176834	1.13181	0.014829	up	12:-:118063593-118136026	12:-:118063593-118136026	ENSG00000176834	54621	Q8N0Z9	VSIG10	V-set and immunoglobulin domain containing 10 [Source:HGNC Symbol;Acc:HGNC:26078]	1.65518	1.53504	1.61315	0.88994	1.05431	2.78641	1.56533	1.21245	5.14837	3.7983
ENSG00000160781	1.13073	0.0320264	up	1:-:156243321-156248117	1:-:156243321-156248117	ENSG00000160781	79957	Q6TCH4	PAQR6	progestin and adipoQ receptor family member 6 [Source:HGNC Symbol;Acc:HGNC:30132]	2.75618	8.16496	4.84851	7.06142	2.44128	18.3785	5.087	4.98537	6.4412	16.7998
ENSG00000152455	1.13042	0.0246393	up	10:+:14878820-14904315	10:+:14878820-14904315	ENSG00000152455	79723	Q9H5I1	SUV39H2	suppressor of variegation 3-9 homolog 2 [Source:HGNC Symbol;Acc:HGNC:17287]	1.35556	2.91999	1.17636	1.11186	1.72464	3.41404	4.00983	4.17854	2.41125	1.32628
ENSG00000204954	1.12993	0.00175399	up	12:-:103950202-103965708	12:-:103950202-103965708	ENSG00000204954	728568	Q69YU5	C12orf73	chromosome 12 open reading frame 73 [Source:HGNC Symbol;Acc:HGNC:34450]	1.67326	1.68116	1.67913	2.20603	2.79222	3.87636	3.99925	2.79681	4.46431	3.53112
ENSG00000273702	1.12689	0.0177087	up	17:-:59618553-59619714	17:-:59618553-59619714	ENSG00000273702	-	-	AC091271.1	-	0.5421	0.74784	0.32875	1.25201	0.74395	1.08802	0.79038	1.14758	1.70547	1.41788
ENSG00000159915	1.12636	0.0255024	up	19:+:44259880-44275317	19:+:44259880-44275317	ENSG00000159915	353355	A6NK53	ZNF233	zinc finger protein 233 [Source:HGNC Symbol;Acc:HGNC:30946]	0.37366	0.17653	0.15375	0.53547	0.57487	0.52636	0.35687	0.4786	0.66272	1.14175
ENSG00000187840	1.12483	0.0172986	up	8:+:38030341-38060365	8:+:38030341-38060365	ENSG00000187840	1978	Q13541	EIF4EBP1	eukaryotic translation initiation factor 4E binding protein 1 [Source:HGNC Symbol;Acc:HGNC:3288]	19.8114	45.9179	62.0163	15.1499	35.9916	102.21	81.0922	62.1629	55.4159	43.9932
ENSG00000167815	1.12304	0.0120009	up	19:-:12796820-12801859	19:-:12796820-12801859	ENSG00000167815	7001	P32119	PRDX2	peroxiredoxin 2 [Source:HGNC Symbol;Acc:HGNC:9353]	26.5345	63.9563	43.1291	16.9029	73.1021	67.0992	89.7359	85.1476	109.657	70.8916
ENSG00000181982	1.12181	0.0088014	up	4:-:24806117-24980204	4:-:24806117-24980204	ENSG00000181982	91050	Q6ZUS6	CCDC149	coiled-coil domain containing 149 [Source:HGNC Symbol;Acc:HGNC:25405]	1.10974	1.11284	0.63007	0.3773	0.5634	1.01911	0.97712	1.15819	1.28689	2.30693
ENSG00000187244	1.12086	0.0025643	up	19:+:44809059-44821421	19:+:44809059-44821421	ENSG00000187244	4059	P50895	BCAM	basal cell adhesion molecule (Lutheran blood group) [Source:HGNC Symbol;Acc:HGNC:6722]	15.7011	24.9114	15.586	15.9223	16.3884	19.5875	40.8591	36.479	36.3058	63.6363
ENSG00000105552	1.12048	0.00312042	up	19:-:48795062-48811029	19:-:48795062-48811029	ENSG00000105552	587	O15382	BCAT2	branched chain amino acid transaminase 2 [Source:HGNC Symbol;Acc:HGNC:977]	8.08441	10.219	5.88041	5.97355	9.85574	21.7606	17.6559	21.3939	14.0457	9.71195
ENSG00000273314	1.12047	0.0127818	up	7:-:148696467-148698664	7:-:148696467-148698664	ENSG00000273314	-	-	AC005229.4	-	1.01804	1.59377	1.2128	1.51799	1.50899	3.3181	2.0544	1.25328	3.81454	2.77579
ENSG00000245573	1.11952	0.0276581	up	11:+:27506838-27698174	11:+:27506838-27698174	ENSG00000245573	497258	-	BDNF-AS	BDNF antisense RNA	0.53999	0.47616	0.31872	0.71077	0.4001	1.67884	0.41766	0.47797	1.22058	1.18146
ENSG00000270558	1.11909	0.0132329	up	5:-:37286449-37286977	5:-:37286449-37286977	ENSG00000270558	-	-	AC025449.1	-	1.93725	2.49828	1.16168	1.71267	2.36787	2.17592	3.7938	4.5772	3.29797	3.21184
ENSG00000273466	1.11881	0.026638	up	2:-:218633256-218634014	2:-:218633256-218634014	ENSG00000273466	-	-	AC012510.1	-	1.56078	1.2761	2.79003	2.54805	1.87115	2.42399	4.32478	5.73305	3.86073	1.98982
ENSG00000243449	1.11822	0.0462663	up	4:+:2041993-2043970	4:+:2041993-2043970	ENSG00000243449	401115	Q5BLP8	C4orf48	chromosome 4 open reading frame 48 [Source:HGNC Symbol;Acc:HGNC:34437]	17.2542	27.5582	26.7895	25.3604	17.2176	15.4103	88.2201	43.7836	84.1573	26.8081
ENSG00000272711	1.11805	0.0493295	up	2:-:74832655-74833987	2:-:74832655-74833987	ENSG00000272711	-	-	AC019069.1	-	1.43885	1.61618	1.98733	1.41163	1.60144	3.1143	2.62198	1.81646	8.61518	1.44199
ENSG00000159055	1.11738	0.00344536	up	21:-:32268219-32279069	21:-:32268219-32279069	ENSG00000159055	54069	Q9NYP9	MIS18A	MIS18 kinetochore protein A [Source:HGNC Symbol;Acc:HGNC:1286]	6.54256	10.4127	6.05361	11.5126	6.42003	16.2524	20.9069	10.4074	19.6563	12.0175
ENSG00000140905	1.11724	0.00274124	up	16:-:81081938-81096425	16:-:81081938-81096425	ENSG00000140905	2653	P23434	GCSH	glycine cleavage system protein H [Source:HGNC Symbol;Acc:HGNC:4208]	2.12737	1.65186	1.31669	1.13485	1.90721	2.27341	2.92329	3.88186	2.79154	2.79814
ENSG00000240024	1.11697	0.0341685	up	3:+:183447608-183456013	3:+:183447608-183456013	ENSG00000240024	100505687	-	LINC00888	long intergenic non-protein coding RNA 888	2.53687	2.23857	1.78091	1.96634	1.28323	7.47797	1.50843	3.0588	1.95929	8.27105
ENSG00000237310	1.11616	0.0470954	up	7:+:66493706-66495474	7:+:66493706-66495474	ENSG00000237310	100289098	-	AC008267.5	uncharacterized LOC100289098	1.49733	1.44161	1.46097	2.96839	2.00926	1.57249	3.60628	2.69687	8.64157	2.43132
ENSG00000162437	1.11613	0.0078216	up	1:+:64745095-64833232	1:+:64745095-64833232	ENSG00000162437	55225	Q9HCJ3	RAVER2	ribonucleoprotein, PTB binding 2 [Source:HGNC Symbol;Acc:HGNC:25577]	1.67592	3.14209	2.35452	1.99922	4.11702	5.7884	2.69547	3.19845	6.53526	8.64756
ENSG00000159214	1.11603	0.0121129	up	1:+:43991359-43996528	1:+:43991359-43996528	ENSG00000159214	149473	Q8N4L8	CCDC24	coiled-coil domain containing 24 [Source:HGNC Symbol;Acc:HGNC:28688]	2.79622	3.22957	2.47918	8.34636	3.64362	13.1967	7.20702	4.58149	7.76608	5.49781
ENSG00000169884	1.11568	0.0397394	up	12:-:48965340-48971763	12:-:48965340-48971763	ENSG00000169884	7480	O00744	WNT10B	Wnt family member 10B [Source:HGNC Symbol;Acc:HGNC:12775]	3.24005	6.09777	4.23908	13.7384	2.13399	14.1326	4.09184	7.22793	14.9537	9.95854
ENSG00000197279	1.11472	0.0241944	up	6:+:28080975-28089563	6:+:28080975-28089563	ENSG00000197279	7718	Q53Z40	ZNF165	zinc finger protein 165 [Source:HGNC Symbol;Acc:HGNC:12953]	0.87013	0.57568	0.99716	1.48018	1.12201	0.77467	1.53369	1.5614	3.26382	2.43546
ENSG00000162062	1.1146	0.00378572	up	16:+:2460080-2464963	16:+:2460080-2464963	ENSG00000162062	80178	Q7L2K0	TEDC2	tubulin epsilon and delta complex 2 [Source:HGNC Symbol;Acc:HGNC:25849]	2.23023	2.94332	2.27543	1.55978	2.52518	5.74227	5.11605	3.81166	3.25527	3.46071
ENSG00000171159	1.11398	0.00384224	up	9:+:128160260-128163928	9:+:128160260-128163928	ENSG00000171159	79095	Q9BUW7	C9orf16	chromosome 9 open reading frame 16 [Source:HGNC Symbol;Acc:HGNC:17823]	22.4412	18.3872	27.8363	30.024	21.002	24.9668	49.7135	41.5739	71.4978	69.3253
ENSG00000125995	1.11263	0.0061322	up	20:+:35699272-35700984	20:+:35699272-35700984	ENSG00000125995	140823	P60602	ROMO1	reactive oxygen species modulator 1 [Source:HGNC Symbol;Acc:HGNC:16185]	27.9913	31.2693	39.5703	56.4764	33.5003	46.9864	105.79	86.4049	96.2118	51.3278
ENSG00000180089	1.11125	0.0168953	up	19:-:55226639-55229264	19:-:55226639-55229264	ENSG00000180089	255043	Q8N661	TMEM86B	transmembrane protein 86B [Source:HGNC Symbol;Acc:HGNC:28448]	1.53953	1.55462	1.46419	1.67531	1.56873	2.89946	2.41905	6.13372	2.62199	1.56525
ENSG00000166171	1.10987	0.0287451	up	10:+:101570560-101609668	10:+:101570560-101609668	ENSG00000166171	25911	Q9BVM2	DPCD	deleted in primary ciliary dyskinesia homolog (mouse) [Source:HGNC Symbol;Acc:HGNC:24542]	3.88552	4.50491	4.6791	3.50897	8.59009	7.2327	13.1766	8.99765	15.7501	4.04082
ENSG00000129195	1.10864	0.0187326	up	17:+:6444415-6451469	17:+:6444415-6451469	ENSG00000129195	54478	A0A0S2Z5F0	PIMREG	PICALM interacting mitotic regulator [Source:HGNC Symbol;Acc:HGNC:25483]	1.02578	2.59727	1.71796	1.16031	2.89976	4.16099	1.52426	2.68814	3.27302	5.00945
ENSG00000183628	1.10846	0.0092964	up	22:+:18906028-18914238	22:+:18906028-18914238	ENSG00000183628	8214	Q14129	DGCR6	DiGeorge syndrome critical region gene 6 [Source:HGNC Symbol;Acc:HGNC:2846]	0.81476	1.41921	0.99426	1.37743	1.34614	4.59553	2.07345	1.81561	1.58211	1.72536
ENSG00000186889	1.10562	0.021948	up	2:-:62500221-62511894	2:-:62500221-62511894	ENSG00000186889	200728	Q86X19	TMEM17	transmembrane protein 17 [Source:HGNC Symbol;Acc:HGNC:26623]	1.01522	2.32522	1.02483	0.52877	1.90504	1.93634	1.78804	1.9064	2.70658	2.2388
ENSG00000272141	1.10511	0.0228236	up	1:+:1169357-1170343	1:+:1169357-1170343	ENSG00000272141	-	-	AL390719.2	-	6.46795	12.106	18.9984	15.5785	17.5529	13.6218	24.5812	16.6304	48.0943	36.8284
ENSG00000157992	1.10383	0.0106691	up	2:+:27442366-27446481	2:+:27442366-27446481	ENSG00000157992	200634	Q53RY4	KRTCAP3	keratinocyte associated protein 3 [Source:HGNC Symbol;Acc:HGNC:28943]	6.77497	15.1425	13.4067	4.70662	13.7693	19.28	19.4687	15.2323	25.0631	15.9696
ENSG00000134265	1.10157	0.0065833	up	18:+:10525905-10552761	18:+:10525905-10552761	ENSG00000134265	8774	Q6FHY4	NAPG	NSF attachment protein gamma [Source:HGNC Symbol;Acc:HGNC:7642]	2.78892	2.5879	2.01441	2.58104	7.32727	8.70863	4.71932	5.41203	4.50288	7.57953
ENSG00000149300	1.10047	0.0363534	up	11:+:111918032-111926872	11:+:111918032-111926872	ENSG00000149300	91894	Q96A22	C11orf52	chromosome 11 open reading frame 52 [Source:HGNC Symbol;Acc:HGNC:30531]	1.30581	0.63364	0.87197	1.13735	0.50967	0.51368	1.78582	2.34433	1.72675	1.84971
ENSG00000174307	1.1001	0.0262904	up	1:-:201464383-201469237	1:-:201464383-201469237	ENSG00000174307	23612	Q9Y5J5	PHLDA3	pleckstrin homology like domain family A member 3 [Source:HGNC Symbol;Acc:HGNC:8934]	6.30986	31.529	29.5207	23.2975	23.6917	88.6154	37.8854	40.865	27.4421	37.3489
ENSG00000257698	1.0997	0.0237427	up	12:-:57931528-57936175	12:-:57931528-57936175	ENSG00000257698	-	-	AC084033.3	-	3.66185	1.94562	1.50012	2.72901	1.93635	2.92684	4.91956	5.00834	7.0683	2.00139
ENSG00000226976	1.09739	0.00770493	up	6:+:37044860-37045189	6:+:37044860-37045189	ENSG00000226976	285849	-	COX6A1P2	cytochrome c oxidase subunit 6A1 pseudogene 2 [Source:HGNC Symbol;Acc:HGNC:35239]	9.25941	8.5308	14.6963	8.63239	9.03499	14.7528	24.1717	17.8915	17.6824	14.3799
ENSG00000273162	1.09619	0.0429863	up	10:-:101060029-101061005	10:-:101060029-101061005	ENSG00000273162	-	-	AL133215.2	-	0.38493	0.59296	0.323	0.41908	0.69522	0.62771	1.20117	0.45795	0.93619	1.09789
ENSG00000169136	1.09607	0.0340932	up	19:+:49928702-49933935	19:+:49928702-49933935	ENSG00000169136	22809	Q9Y2D1	ATF5	activating transcription factor 5 [Source:HGNC Symbol;Acc:HGNC:790]	22.3048	47.9871	92.8444	26.1082	47.8564	101.833	46.639	96.5204	210.709	59.9052
ENSG00000152082	1.0938	0.0160626	up	2:+:130181737-130190729	2:+:130181737-130190729	ENSG00000152082	80097	Q6NZ67	MZT2B	mitotic spindle organizing protein 2B [Source:HGNC Symbol;Acc:HGNC:25886]	31.8472	18.3783	33.4923	37.2222	23.6446	25.1078	87.5363	71.1359	82.4508	48.2954
ENSG00000079462	1.09377	0.00828373	up	19:-:42297033-42303546	19:-:42297033-42303546	ENSG00000079462	5050	Q15102	PAFAH1B3	platelet activating factor acetylhydrolase 1b catalytic subunit 3 [Source:HGNC Symbol;Acc:HGNC:8576]	8.11648	9.40283	9.56854	9.84735	10.6115	7.5599	17.4393	21.4656	25.9682	23.784
ENSG00000275632	1.09052	0.0178613	up	20:+:6000418-6000941	20:+:6000418-6000941	ENSG00000275632	-	-	AL035461.2	-	6.83609	9.12107	4.92878	4.6883	4.3264	7.31026	14.5897	12.2554	12.6551	6.1902
ENSG00000173991	1.09038	0.00675855	up	17:+:39664187-39666555	17:+:39664187-39666555	ENSG00000173991	8557	O15273	TCAP	titin-cap [Source:HGNC Symbol;Acc:HGNC:11610]	1.87329	3.19782	1.62725	1.85065	1.46257	2.86647	4.0697	3.21909	4.54369	2.68792
ENSG00000165698	1.08851	0.00676068	up	9:+:132878027-132890201	9:+:132878027-132890201	ENSG00000165698	11092	A0A024R8F2	SPACA9	sperm acrosome associated 9 [Source:HGNC Symbol;Acc:HGNC:1367]	3.21722	2.04575	1.53263	2.34222	1.7936	2.07882	4.46131	3.20712	5.49304	5.01857
ENSG00000179431	1.08839	0.0420041	up	11:+:35618419-35620868	11:+:35618419-35620868	ENSG00000179431	24147	Q86VR8	FJX1	four jointed box 1 [Source:HGNC Symbol;Acc:HGNC:17166]	4.89281	28.7299	12.7515	24.7978	11.7663	55.5851	27.5561	25.105	31.3217	14.8366
ENSG00000167799	1.08759	0.0149828	up	11:-:67627938-67629930	11:-:67627938-67629930	ENSG00000167799	254552	Q8WV74	NUDT8	nudix hydrolase 8 [Source:HGNC Symbol;Acc:HGNC:8055]	2.62615	5.95896	4.8025	2.60462	3.48061	9.10229	6.95302	5.94182	3.4393	9.6923
ENSG00000224536	1.08733	0.0202334	up	1:+:201507241-201534784	1:+:201507241-201534784	ENSG00000224536	-	-	AC096677.1	-	3.29934	3.48107	1.36399	2.92493	2.77552	3.65323	5.17751	2.36106	9.11708	6.07924
ENSG00000138030	1.08608	0.00644574	up	2:+:27086747-27100772	2:+:27086747-27100772	ENSG00000138030	3795	P50053	KHK	ketohexokinase [Source:HGNC Symbol;Acc:HGNC:6315]	2.75296	3.00549	2.26879	1.3836	1.2511	4.08846	3.50716	4.42949	2.76213	3.55584
ENSG00000166228	1.08562	0.0122642	up	10:-:70882280-70888784	10:-:70882280-70888784	ENSG00000166228	5092	P61457	PCBD1	pterin-4 alpha-carbinolamine dehydratase 1 [Source:HGNC Symbol;Acc:HGNC:8646]	20.0037	13.4602	14.4839	15.8687	23.9822	26.3172	41.6818	21.8943	74.4427	24.2494
ENSG00000264608	1.08367	0.0173392	up	17:-:28601827-28602284	17:-:28601827-28602284	ENSG00000264608	-	-	AC005726.3	-	4.92674	5.43514	3.78958	6.33397	4.91134	4.40845	8.63387	9.27099	17.234	8.28134
ENSG00000236200	1.08215	0.0198005	up	1:-:43699765-43708138	1:-:43699765-43708138	ENSG00000236200	100132774	-	KDM4A-AS1	KDM4A antisense RNA 1 [Source:HGNC Symbol;Acc:HGNC:40528]	1.01273	1.45788	0.82141	2.61212	0.87252	2.13519	1.27272	1.70371	2.83325	3.81729
ENSG00000185437	1.0819	0.028727	up	21:+:39445855-39515506	21:+:39445855-39515506	ENSG00000185437	6450	P55822	SH3BGR	SH3 domain binding glutamate rich protein [Source:HGNC Symbol;Acc:HGNC:10822]	0.88673	1.41078	0.45549	1.46261	0.99717	1.24957	1.37655	1.22645	3.48393	1.76788
ENSG00000004478	1.08166	0.00345366	up	12:+:2794953-2805423	12:+:2794953-2805423	ENSG00000004478	2288	Q02790	FKBP4	FK506 binding protein 4 [Source:HGNC Symbol;Acc:HGNC:3720]	20.2794	30.9672	17.9042	25.711	34.8691	94.9065	49.4934	36.5839	65.0924	35.282
ENSG00000196465	1.08112	0.0106713	up	12:+:56152256-56159647	12:+:56152256-56159647	ENSG00000196465	140465	P14649	MYL6B	myosin light chain 6B [Source:HGNC Symbol;Acc:HGNC:29823]	4.79758	7.75765	4.62235	4.5683	7.64914	6.9915	18.3151	12.5955	13.4351	7.27776
ENSG00000114859	1.0803	0.0183278	up	3:-:184346185-184361651	3:-:184346185-184361651	ENSG00000114859	1181	P51788	CLCN2	chloride voltage-gated channel 2 [Source:HGNC Symbol;Acc:HGNC:2020]	0.54053	1.09711	0.68595	0.65723	0.62513	2.44646	0.50387	1.01286	1.42691	1.71763
ENSG00000174951	1.07855	0.0278104	up	19:-:48748011-48755390	19:-:48748011-48755390	ENSG00000174951	2523	P19526	FUT1	fucosyltransferase 1 (H blood group) [Source:HGNC Symbol;Acc:HGNC:4012]	0.71223	2.75749	2.35194	1.15138	2.19767	4.75982	2.42409	2.10082	2.04365	4.3034
ENSG00000218537	1.07743	0.00813516	up	22:-:23894426-23898930	22:-:23894426-23898930	ENSG00000218537	284889	-	MIF-AS1	MIF antisense RNA 1 [Source:HGNC Symbol;Acc:HGNC:27669]	14.5996	19.9683	20.8961	19.6955	35.679	33.8468	49.7444	40.7859	70.5009	26.755
ENSG00000188343	1.0764	0.0135246	up	8:+:93698561-93731527	8:+:93698561-93731527	ENSG00000188343	137392	A1XBS5	FAM92A	family with sequence similarity 92 member A [Source:HGNC Symbol;Acc:HGNC:30452]	0.78528	2.40475	1.43759	0.81213	2.28639	2.30185	2.1423	2.26445	3.51974	2.58486
ENSG00000214975	1.07569	0.0360575	up	6:+:24976419-24976982	6:+:24976419-24976982	ENSG00000214975	134997	-	PPIAP29	peptidylprolyl isomerase A pseudogene 29 [Source:HGNC Symbol;Acc:HGNC:43021]	2.9581	7.8003	8.4875	6.05796	11.1369	13.8215	17.7747	7.89391	12.5933	8.90785
ENSG00000272417	1.07082	0.0491463	up	5:-:10203600-10204040	5:-:10203600-10204040	ENSG00000272417	-	-	AC034229.4	-	0.89542	0.57473	0.37662	1.10623	1.12015	1.9041	0.90631	0.79573	1.8052	1.47883
ENSG00000279730	1.07059	0.0401565	up	13:+:18297554-18298733	13:+:18297554-18298733	ENSG00000279730	57108	-	SETD8P1	SET domain containing 8 pseudogene 1 [Source:HGNC Symbol;Acc:HGNC:30088]	0.58961	0.27616	0.50671	0.29531	0.65785	0.89552	0.41799	0.67656	0.76796	1.21445
ENSG00000144451	1.06947	0.0121106	up	2:+:213284379-214410501	2:+:213284379-214410501	ENSG00000144451	79582	B4DYB5	SPAG16	sperm associated antigen 16 [Source:HGNC Symbol;Acc:HGNC:23225]	1.27074	1.15329	1.41207	1.55515	1.96144	4.53292	1.37286	1.47473	3.78477	4.13311
ENSG00000024526	1.0664	0.0412721	up	1:-:68474152-68497221	1:-:68474152-68497221	ENSG00000024526	55635	Q5TB30	DEPDC1	DEP domain containing 1 [Source:HGNC Symbol;Acc:HGNC:22949]	1.02395	2.25533	1.12526	0.63743	2.78798	3.32235	2.10869	1.20955	1.95804	5.07106
ENSG00000125967	1.06423	0.0115903	up	20:-:33657087-33674463	20:-:33657087-33674463	ENSG00000125967	63941	Q96P71	NECAB3	N-terminal EF-hand calcium binding protein 3 [Source:HGNC Symbol;Acc:HGNC:15851]	2.23246	3.07292	2.89948	8.06955	2.33429	5.71484	4.3773	4.88352	9.04835	7.38941
ENSG00000175701	1.06378	0.00587211	up	2:-:110211529-110245420	2:-:110211529-110245420	ENSG00000175701	205251	Q8NCU8	SMIM37	small integral membrane protein 37 [Source:HGNC Symbol;Acc:HGNC:27339]	4.92784	3.73819	8.268	7.10604	6.72231	9.0485	17.5883	9.11515	9.37336	11.8529
ENSG00000204366	1.06377	0.0373471	up	6:-:31899607-31901992	6:-:31899607-31901992	ENSG00000204366	221527	Q9Y330	ZBTB12	zinc finger and BTB domain containing 12 [Source:HGNC Symbol;Acc:HGNC:19066]	4.17192	6.45466	1.85134	4.20479	3.40143	7.36175	4.73951	4.22974	18.7945	4.8695
ENSG00000233270	1.06288	0.029678	up	19:-:5576660-5576938	19:-:5576660-5576938	ENSG00000233270	100130109	-	SNRPEP4	small nuclear ribonucleoprotein polypeptide E pseudogene 4 [Source:HGNC Symbol;Acc:HGNC:43446]	6.13312	4.57465	8.00679	10.6787	10.0226	9.23201	14.6608	11.1942	26.3482	8.91944
ENSG00000160767	1.06213	0.00723941	up	1:-:155247205-155255483	1:-:155247205-155255483	ENSG00000160767	10712	P81408	FAM189B	family with sequence similarity 189 member B [Source:HGNC Symbol;Acc:HGNC:1233]	5.48372	6.1508	7.02011	6.31921	11.5891	15.8924	10.6794	7.51042	25.7825	15.5067
ENSG00000110492	1.06082	0.0495032	up	11:+:46380756-46383837	11:+:46380756-46383837	ENSG00000110492	4192	P21741	MDK	midkine [Source:HGNC Symbol;Acc:HGNC:6972]	23.8386	120.672	51.0556	27.8406	66.4518	45.6493	138.084	80.6026	196.628	96.8033
ENSG00000112039	1.06	0.00303187	up	6:+:35452361-35467103	6:+:35452361-35467103	ENSG00000112039	2178	Q9HB96	FANCE	Fanconi anemia complementation group E [Source:HGNC Symbol;Acc:HGNC:3586]	4.0015	9.05197	4.82529	7.89296	5.79212	12.1538	8.52721	11.4076	8.63154	17.4781
ENSG00000115541	1.05991	0.000423412	up	2:+:197499994-197503457	2:+:197499994-197503457	ENSG00000115541	3336	P61604	HSPE1	heat shock protein family E (Hsp10) member 1 [Source:HGNC Symbol;Acc:HGNC:5269]	27.9535	27.6413	23.8086	31.0392	33.5177	60.9046	89.6587	45.2715	52.3693	51.9034
ENSG00000085840	1.05705	0.0113966	up	1:-:52372829-52404459	1:-:52372829-52404459	ENSG00000085840	4998	Q13415	ORC1	origin recognition complex subunit 1 [Source:HGNC Symbol;Acc:HGNC:8487]	1.84047	4.52455	3.94046	2.59388	6.36508	7.06498	7.82779	6.06354	5.81325	5.57487
ENSG00000277182	1.05593	0.046217	up	17:+:38749360-38751457	17:+:38749360-38751457	ENSG00000277182	100287808	-	AC006449.5	uncharacterized LOC100287808	0.56017	0.5911	0.15833	0.28236	0.25227	0.35077	0.64853	0.38471	0.6701	0.84666
ENSG00000178078	1.05503	0.0112304	up	19:-:4324043-4342786	19:-:4324043-4342786	ENSG00000178078	55620	Q9UGK3	STAP2	signal transducing adaptor family member 2 [Source:HGNC Symbol;Acc:HGNC:30430]	8.47052	42.0789	29.63	25.886	31.7925	48.498	56.8064	44.2613	41.4512	61.315
ENSG00000241945	1.05107	0.00208727	up	21:+:44107290-44131181	21:+:44107290-44131181	ENSG00000241945	5822	Q15269	PWP2	PWP2, small subunit processome component [Source:HGNC Symbol;Acc:HGNC:9711]	1.97898	3.13066	3.23084	2.34843	2.84565	6.0396	4.60208	4.12286	7.07671	3.93601
ENSG00000144485	1.05098	0.017378	up	2:-:238238267-238240662	2:-:238238267-238240662	ENSG00000144485	55502	Q96HZ4	HES6	hes family bHLH transcription factor 6 [Source:HGNC Symbol;Acc:HGNC:18254]	3.22165	4.40823	2.59692	5.05503	1.55897	3.58036	3.55686	7.10623	8.48984	6.42425
ENSG00000085999	1.05046	0.0205194	up	1:+:46247688-46278473	1:+:46247688-46278473	ENSG00000085999	8438	A8K996	RAD54L	RAD54 like [Source:HGNC Symbol;Acc:HGNC:9826]	2.11044	6.77771	4.60209	3.57739	7.73086	13.4121	10.4604	6.91567	6.75784	6.20608
ENSG00000177045	1.05031	0.00998939	up	19:-:45764785-45769226	19:-:45764785-45769226	ENSG00000177045	147912	Q8N196	SIX5	SIX homeobox 5 [Source:HGNC Symbol;Acc:HGNC:10891]	3.72003	4.87982	3.63144	3.36606	4.82236	4.01435	5.19656	8.29681	13.9349	9.07581
ENSG00000133315	1.0503	0.0157528	up	11:-:63998558-64166106	11:-:63998558-64166106	ENSG00000133315	28992	Q9BQ69	MACROD1	MACRO domain containing 1 [Source:HGNC Symbol;Acc:HGNC:29598]	3.07845	4.48916	3.30746	2.10596	4.61537	8.81164	2.81699	8.84855	5.91901	5.65228
ENSG00000258199	1.04938	0.0106549	up	12:-:56162359-56190284	12:-:56162359-56190284	ENSG00000258199	-	-	AC073896.4	-	4.61928	4.15537	5.11042	5.44744	3.50219	5.68904	9.15805	9.92672	8.19586	6.15371
ENSG00000185838	1.04743	0.00425001	up	22:-:19783224-19854939	22:-:19783224-19854939	ENSG00000185838	54584	Q9BYB4	GNB1L	G protein subunit beta 1 like [Source:HGNC Symbol;Acc:HGNC:4397]	1.27143	2.08164	1.58293	2.35866	1.52868	3.51581	3.61793	4.03496	2.3851	2.45964
ENSG00000125611	1.04485	0.00184904	up	2:+:112584240-112589275	2:+:112584240-112589275	ENSG00000125611	84269	Q9BSY4	CHCHD5	coiled-coil-helix-coiled-coil-helix domain containing 5 [Source:HGNC Symbol;Acc:HGNC:17840]	2.59621	2.59591	2.71954	3.2399	2.59307	3.47377	6.10136	5.48689	5.10531	4.90121
ENSG00000188157	1.04441	0.0142965	up	1:+:1020123-1056118	1:+:1020123-1056118	ENSG00000188157	375790	O00468	AGRN	agrin [Source:HGNC Symbol;Acc:HGNC:329]	15.3132	51.5512	33.8631	17.3851	53.6148	70.1269	54.6019	46.5429	52.4927	93.4415
ENSG00000139835	1.0443	0.0284654	up	13:-:113324164-113364148	13:-:113324164-113364148	ENSG00000139835	79774	Q5TC63	GRTP1	growth hormone regulated TBC protein 1 [Source:HGNC Symbol;Acc:HGNC:20310]	2.56971	8.85951	5.71856	2.95166	3.12794	6.58114	6.14462	11.0835	4.1474	11.9388
ENSG00000152253	1.04382	0.00644916	up	2:-:168834132-168913371	2:-:168834132-168913371	ENSG00000152253	57405	Q9HBM1	SPC25	SPC25, NDC80 kinetochore complex component [Source:HGNC Symbol;Acc:HGNC:24031]	2.51772	3.84008	3.29742	2.59313	6.01333	5.96024	6.78557	4.99406	4.94066	8.03111
ENSG00000205090	1.04269	0.0370801	up	1:-:1535174-1540453	1:-:1535174-1540453	ENSG00000205090	339453	Q5SV17	TMEM240	transmembrane protein 240 [Source:HGNC Symbol;Acc:HGNC:25186]	1.42391	1.29876	0.63788	0.79541	0.50498	2.17413	1.09072	1.34137	2.31365	0.90164
ENSG00000204104	1.04211	0.00343197	up	2:+:238320441-238400900	2:+:238320441-238400900	ENSG00000204104	26146	Q8TDR0	TRAF3IP1	TRAF3 interacting protein 1 [Source:HGNC Symbol;Acc:HGNC:17861]	4.01366	1.96057	2.00731	3.38878	3.4314	6.44525	3.69479	4.0397	4.89947	8.28932
ENSG00000104147	1.04205	0.00430081	up	15:-:41309268-41332621	15:-:41309268-41332621	ENSG00000104147	11339	A0A024R9N0	OIP5	Opa interacting protein 5 [Source:HGNC Symbol;Acc:HGNC:20300]	3.1796	5.22173	3.66175	4.41218	5.84508	8.44257	8.11861	7.15465	8.01682	6.27616
ENSG00000115758	1.03799	0.0176002	up	2:-:10439968-10448504	2:-:10439968-10448504	ENSG00000115758	4953	P11926	ODC1	ornithine decarboxylase 1 [Source:HGNC Symbol;Acc:HGNC:8109]	32.5327	50.7435	70.1764	52.7949	48.3707	192.888	138.254	119.366	63.3182	52.3425
ENSG00000167468	1.03733	0.0032447	up	19:+:1103926-1106791	19:+:1103926-1106791	ENSG00000167468	2879	P36969	GPX4	glutathione peroxidase 4 [Source:HGNC Symbol;Acc:HGNC:4556]	51.8057	58.32	42.2872	61.6974	52.1972	95.0033	171.978	129.022	115.018	63.4297
ENSG00000103490	1.03496	0.0176832	up	16:-:31201485-31203450	16:-:31201485-31203450	ENSG00000103490	29108	Q9ULZ3	PYCARD	PYD and CARD domain containing [Source:HGNC Symbol;Acc:HGNC:16608]	34.6075	77.4622	48.6467	57.9496	65.115	208.75	166.131	48.893	137.177	76.5223
ENSG00000213430	1.0344	0.0284596	up	5:+:21882585-21884310	5:+:21882585-21884310	ENSG00000213430	643300	-	HSPD1P1	heat shock protein family D (Hsp60) member 1 pseudogene 1 [Source:HGNC Symbol;Acc:HGNC:35133]	2.12985	1.97717	2.01597	2.70029	3.83306	3.62419	6.88294	3.52748	6.72716	2.30189
ENSG00000175063	1.0341	0.0042511	up	20:+:45812576-45816957	20:+:45812576-45816957	ENSG00000175063	11065	O00762	UBE2C	ubiquitin conjugating enzyme E2 C [Source:HGNC Symbol;Acc:HGNC:15937]	20.3463	29.8377	20.0056	17.6467	27.4718	55.7437	60.4068	46.4503	37.3007	27.3115
ENSG00000138175	1.03361	0.0227556	up	10:-:102673731-102714407	10:-:102673731-102714407	ENSG00000138175	403	P36405	ARL3	ADP ribosylation factor like GTPase 3 [Source:HGNC Symbol;Acc:HGNC:694]	5.01645	9.4311	6.0771	8.0521	8.07305	18.4845	20.1138	17.9978	13.0891	5.58308
ENSG00000149418	1.03357	0.014185	up	11:+:130159562-130210376	11:+:130159562-130210376	ENSG00000149418	6768	Q9Y5Y6	ST14	suppression of tumorigenicity 14 [Source:HGNC Symbol;Acc:HGNC:11344]	15.0192	22.2034	55.6664	21.6928	29.6614	92.4491	50.4369	65.3071	34.0183	40.1734
ENSG00000164045	1.03331	0.0112083	up	3:-:48157146-48188402	3:-:48157146-48188402	ENSG00000164045	993	P30304	CDC25A	cell division cycle 25A [Source:HGNC Symbol;Acc:HGNC:1725]	2.24485	3.21667	2.07359	1.40926	4.34094	5.18611	4.55869	4.39394	5.22296	3.10354
ENSG00000197982	1.03287	0.00771944	up	1:+:37806979-37809454	1:+:37806979-37809454	ENSG00000197982	127687	Q6ZSJ8	C1orf122	chromosome 1 open reading frame 122 [Source:HGNC Symbol;Acc:HGNC:24789]	10.7799	19.3455	18.4514	20.8203	16.7724	31.5695	42.1726	30.0192	48.8556	18.9431
ENSG00000172301	1.0316	0.00579175	up	17:-:31851864-31859337	17:-:31851864-31859337	ENSG00000172301	55352	Q9NQ92	COPRS	coordinator of PRMT5 and differentiation stimulator [Source:HGNC Symbol;Acc:HGNC:28848]	12.2185	22.611	15.4316	14.6917	14.7471	24.6612	48.6599	33.2662	26.6491	21.1712
ENSG00000078070	1.03152	0.0293002	up	3:-:183015218-183116075	3:-:183015218-183116075	ENSG00000078070	56922	A0A0S2Z693	MCCC1	methylcrotonoyl-CoA carboxylase 1 [Source:HGNC Symbol;Acc:HGNC:6936]	5.48533	6.55069	4.0936	7.96966	5.57727	12.1446	5.63647	7.66847	7.9673	37.3153
ENSG00000214026	1.03102	0.0225854	up	11:+:1947278-1984522	11:+:1947278-1984522	ENSG00000214026	6150	A0A024RCB2	MRPL23	mitochondrial ribosomal protein L23 [Source:HGNC Symbol;Acc:HGNC:10322]	6.47228	5.68373	5.85916	7.30895	7.9079	9.86305	29.9766	13.7743	9.90381	7.08411
ENSG00000100276	1.03077	0.025446	up	22:-:29312933-29319679	22:-:29312933-29319679	ENSG00000100276	10633	A0A024R1C8	RASL10A	RAS like family 10 member A [Source:HGNC Symbol;Acc:HGNC:16954]	0.58342	0.62232	0.89347	0.97228	0.37411	1.10355	1.2642	1.21803	0.68811	1.42508
ENSG00000260423	1.03054	0.0197282	up	12:+:9367464-9397617	12:+:9367464-9397617	ENSG00000260423	101930452	-	LINC02367	long intergenic non-protein coding RNA 2367	0.62351	0.35894	0.28577	0.31765	0.3518	0.5999	0.78295	0.45784	0.45742	1.07557
ENSG00000272288	1.02851	0.0369284	up	6:+:34696317-34697470	6:+:34696317-34697470	ENSG00000272288	101929243	-	AL451165.2	uncharacterized LOC101929243	2.18279	1.46757	1.29252	3.01685	1.77338	1.63979	4.11408	3.90289	5.29453	1.94772
ENSG00000176946	1.02598	0.00079195	up	2:-:241584405-241637449	2:-:241584405-241637449	ENSG00000176946	51078	Q8WY91	THAP4	THAP domain containing 4 [Source:HGNC Symbol;Acc:HGNC:23187]	9.81714	10.8468	12.8828	10.2203	15.6325	18.9957	19.6452	20.6598	30.7383	25.3125
ENSG00000093100	1.02318	0.048675	up	22:-:17787652-17811497	22:-:17787652-17811497	ENSG00000093100	-	-	AC016026.1	-	2.56553	4.65566	6.92676	3.05952	2.8045	5.38235	8.98726	14.3209	2.90977	7.12978
ENSG00000226415	1.02282	0.0458339	up	1:+:76699789-76700538	1:+:76699789-76700538	ENSG00000226415	729708	-	TPI1P1	triosephosphate isomerase 1 pseudogene 1 [Source:HGNC Symbol;Acc:HGNC:35449]	2.36927	5.69671	7.9169	3.92602	6.22185	12.7434	9.78516	9.4748	5.54441	5.38894
ENSG00000151729	1.02253	0.016477	up	4:+:185143241-185150382	4:+:185143241-185150382	ENSG00000151729	291	P12235	SLC25A4	solute carrier family 25 member 4 [Source:HGNC Symbol;Acc:HGNC:10990]	4.87173	6.43393	4.22594	3.61844	10.3563	9.5771	6.22344	7.58126	21.0765	12.1666
ENSG00000183208	1.0214	0.0386594	up	15:+:90233808-90245811	15:+:90233808-90245811	ENSG00000183208	390637	A0A024RC68	GDPGP1	GDP-D-glucose phosphorylase 1 [Source:HGNC Symbol;Acc:HGNC:34360]	0.80708	0.29296	0.2932	0.80512	0.57556	0.38373	0.7874	1.13724	1.55662	0.8391
ENSG00000184220	1.021	0.00957422	up	3:+:99817834-100181732	3:+:99817834-100181732	ENSG00000184220	84319	Q9BQ75	CMSS1	cms1 ribosomal small subunit homolog (yeast) [Source:HGNC Symbol;Acc:HGNC:28666]	1.68086	2.02508	1.45932	1.73748	3.09658	4.14953	3.61268	2.99205	5.52074	2.10898
ENSG00000183527	1.02096	0.00112614	up	21:-:39174769-39183851	21:-:39174769-39183851	ENSG00000183527	8624	O95456	PSMG1	proteasome assembly chaperone 1 [Source:HGNC Symbol;Acc:HGNC:3043]	6.74392	10.2037	9.4139	8.98523	5.98716	15.5348	13.5623	15.2786	17.8911	13.6206
ENSG00000131116	1.01827	0.00739573	up	19:-:43607219-43619874	19:-:43607219-43619874	ENSG00000131116	126299	Q96B54	ZNF428	zinc finger protein 428 [Source:HGNC Symbol;Acc:HGNC:20804]	18.4752	28.2655	19.2066	24.5451	37.721	35.1232	63.1732	55.3237	65.3522	31.9543
ENSG00000173207	1.01781	0.00466763	up	1:+:154974653-154979249	1:+:154974653-154979249	ENSG00000173207	1163	P61024	CKS1B	CDC28 protein kinase regulatory subunit 1B [Source:HGNC Symbol;Acc:HGNC:19083]	10.7168	17.9762	15.2627	11.8229	28.2028	33.7284	35.9324	21.2983	39.422	26.2021
ENSG00000269226	1.0177	0.0239638	up	X:-:104063871-104076212	X:-:104063871-104076212	ENSG00000269226	286527	P0CG34	TMSB15B	thymosin beta 15B [Source:NCBI gene;Acc:286527]	0.60201	1.57323	0.90071	0.78265	1.34003	0.96476	1.50853	1.59352	2.30748	1.97077
ENSG00000116698	1.01723	0.0473973	up	1:+:183472216-183598246	1:+:183472216-183598246	ENSG00000116698	9887	Q92540	SMG7	SMG7, nonsense mediated mRNA decay factor [Source:HGNC Symbol;Acc:HGNC:16792]	8.53595	4.85304	4.46824	4.96907	20.8082	7.47691	11.3781	11.0113	16.6978	31.775
ENSG00000162972	1.01665	0.00385371	up	2:+:199955317-200008540	2:+:199955317-200008540	ENSG00000162972	79568	Q8WWC4	MAIP1	matrix AAA peptidase interacting protein 1 [Source:HGNC Symbol;Acc:HGNC:26198]	7.94296	5.62404	4.02438	4.91368	10.0867	9.52787	11.5148	9.71292	12.6984	11.8625
ENSG00000172428	1.01543	0.00577512	up	2:-:240126563-240136807	2:-:240126563-240136807	ENSG00000172428	150678	Q8WXC6	COPS9	COP9 signalosome subunit 9 [Source:HGNC Symbol;Acc:HGNC:21314]	10.2365	9.20291	12.8008	14.6589	12.0745	13.4652	29.7157	25.6692	26.5909	17.6925
ENSG00000171848	1.0146	0.03622	up	2:+:10120698-10131419	2:+:10120698-10131419	ENSG00000171848	6241	P31350	RRM2	ribonucleotide reductase regulatory subunit M2 [Source:HGNC Symbol;Acc:HGNC:10452]	2.13189	6.11004	5.44164	3.23718	5.646	13.742	8.98477	3.76596	12.3209	5.18607
ENSG00000225177	1.01451	0.0378502	up	6:+:138692548-138697288	6:+:138692548-138697288	ENSG00000225177	-	-	AL590617.2	-	1.64147	2.5672	1.55198	1.20677	1.23641	2.04939	3.11577	2.09976	4.98425	1.67402
ENSG00000111678	1.01345	0.00305808	up	12:+:6942978-6946003	12:+:6942978-6946003	ENSG00000111678	113246	Q99622	C12orf57	chromosome 12 open reading frame 57 [Source:HGNC Symbol;Acc:HGNC:29521]	29.7726	31.3962	34.0132	28.5225	20.5289	82.5372	65.1024	41.9995	64.1181	37.5555
ENSG00000117399	1.01279	0.0112616	up	1:+:43358955-43363203	1:+:43358955-43363203	ENSG00000117399	991	Q12834	CDC20	cell division cycle 20 [Source:HGNC Symbol;Acc:HGNC:1723]	11.0765	16.4606	17.705	13.4948	22.8017	39.11	44.2303	39.6376	19.4481	20.017
ENSG00000160284	1.01131	0.0405036	up	21:-:46161148-46184476	21:-:46161148-46184476	ENSG00000160284	84221	Q9H0A9	SPATC1L	spermatogenesis and centriole associated 1 like [Source:HGNC Symbol;Acc:HGNC:1298]	4.92056	4.08949	2.97935	4.48462	3.12313	2.4022	8.39455	8.85193	13.3879	5.62021
ENSG00000115257	1.01083	0.0235803	up	19:-:1481428-1490752	19:-:1481428-1490752	ENSG00000115257	54760	A0A140VJQ9	PCSK4	proprotein convertase subtilisin/kexin type 4 [Source:HGNC Symbol;Acc:HGNC:8746]	0.87523	3.42552	1.01396	1.39679	1.11893	1.46052	2.06318	2.47549	2.67338	3.14098
ENSG00000105258	1.01056	0.00299757	up	19:-:36113710-36115346	19:-:36113710-36115346	ENSG00000105258	5438	P36954	POLR2I	RNA polymerase II subunit I [Source:HGNC Symbol;Acc:HGNC:9196]	10.0909	10.5856	12.244	15.0067	13.3325	17.0037	29.8273	22.2055	25.0134	18.1698
ENSG00000277692	1.00937	0.0258205	up	20:+:32355053-32355734	20:+:32355053-32355734	ENSG00000277692	-	-	AL121583.1	-	0.62036	0.53091	0.51142	0.94525	0.62084	0.83005	1.0474	1.14486	1.03069	1.18273
ENSG00000006704	1.00897	0.0390659	up	7:+:74453790-74602604	7:+:74453790-74602604	ENSG00000006704	9569	Q9UHL9	GTF2IRD1	GTF2I repeat domain containing 1 [Source:HGNC Symbol;Acc:HGNC:4661]	1.29207	6.42052	4.64425	2.16784	6.45771	7.16693	5.57504	4.35948	7.19961	9.26122
ENSG00000099800	1.00748	0.0160008	up	19:-:2425624-2427894	19:-:2425624-2427894	ENSG00000099800	26517	Q9Y5L4	TIMM13	translocase of inner mitochondrial membrane 13 [Source:HGNC Symbol;Acc:HGNC:11816]	22.3539	27.7845	29.0592	28.5102	29.6825	35.7169	97.0298	51.9797	78.5652	30.0665
ENSG00000142945	1.0074	0.0133599	up	1:+:44739818-44767767	1:+:44739818-44767767	ENSG00000142945	11004	Q99661	KIF2C	kinesin family member 2C [Source:HGNC Symbol;Acc:HGNC:6393]	4.572	10.271	7.41614	5.44056	14.0592	17.5734	18.8877	16.7928	11.3145	10.1886
ENSG00000168061	1.00728	0.00901991	up	11:+:65040901-65044828	11:+:65040901-65044828	ENSG00000168061	29901	F8WC89	SAC3D1	SAC3 domain containing 1 [Source:HGNC Symbol;Acc:HGNC:30179]	5.7674	12.214	6.95942	7.86599	10.1503	15.8349	18.0396	14.818	19.5429	8.96369
ENSG00000261188	1.00474	0.0266836	up	22:+:26512537-26514568	22:+:26512537-26514568	ENSG00000261188	-	-	Z95115.1	-	1.7536	1.67943	0.73563	2.58089	2.86079	2.46088	2.42729	2.06372	5.26398	3.4713
ENSG00000096092	1.00163	0.0122646	up	6:+:52671109-52686588	6:+:52671109-52686588	ENSG00000096092	28978	Q9Y6G1	TMEM14A	transmembrane protein 14A [Source:HGNC Symbol;Acc:HGNC:21076]	25.1538	30.9245	25.5746	21.4892	51.0684	49.4952	102.373	35.5694	37.3936	77.5934
ENSG00000196296	1.0014	0.0318629	up	16:+:28878405-28904509	16:+:28878405-28904509	ENSG00000196296	487	Q7Z675	ATP2A1	ATPase sarcoplasmic/endoplasmic reticulum Ca2+ transporting 1 [Source:HGNC Symbol;Acc:HGNC:811]	0.79527	1.42085	0.66262	1.57633	0.83269	3.67565	1.06785	0.94863	2.09003	1.85578
